1  
2  
3  
4  
5  
6  
7  
8  
9  
10  
11  
12  
13  
14  
15  
16  
17  
18  
19  
20  
21  
22  
23  
24  
25  
26  
27  
28  
29  
30  
31  
32  
33  
34  
35  
36  
37  
38  
39  
40  
41  
42  
43  
44  
45

## Noise correlations for faster and more robust learning

Matthew R. Nassar<sup>1,2</sup>, Daniel Scott<sup>1,3</sup>, Apoorva Bhandari<sup>1,3</sup>

1. Robert J. & Nancy D. Carney Institute for Brain Science, Brown University, Providence RI 02912-1821, USA
2. Department of Neuroscience, Brown University, Providence RI 02912-1821, USA
3. Department of Cognitive, Linguistic, and Psychological Sciences, Providence RI, 02912-1821

### *Acknowledgements:*

We would like to thank Josh Gold, Rex Liu, Michael Frank, Drew Linsley, Chris Moore and Jan Drugowitsch for helpful discussion. This work was funded by NIH grants F32MH102009 and R00AG054732 (MRN), NINDS R21NS108380 (AB). The funders had no role in study design, data collection and analysis, decision to publish or preparation of the manuscript.

### *Competing interests:*

The authors have no financial or non-financial conflicts of interest related to this work.

46

47 **Abstract:**

48

49 Distributed population codes are ubiquitous in the brain and pose a challenge to  
50 downstream neurons that must learn an appropriate readout. Here we explore  
51 the possibility that this learning problem is simplified through inductive biases  
52 implemented by stimulus-independent noise correlations that constrain learning  
53 to task-relevant dimensions. We test this idea in a set of neural networks that  
54 learn to perform a perceptual discrimination task. Correlations among similarly  
55 tuned units were manipulated independently of overall population signal-to-noise  
56 ratio in order to test how the format of stored information affects learning. Higher  
57 noise correlations among similarly tuned units led to faster and more robust  
58 learning, favoring homogenous weights assigned to neurons within a functionally  
59 similar pool, and could emerge through Hebbian learning. When multiple  
60 discriminations were learned simultaneously, noise correlations across relevant  
61 feature dimensions sped learning whereas those across irrelevant feature  
62 dimensions slowed it. Our results complement existing theory on noise  
63 correlations by demonstrating that when such correlations are produced without  
64 significant degradation of the signal-to-noise ratio, they can improve the speed of  
65 readout learning by constraining it to appropriate dimensions.

66

67 **Significance statement:**

68

69 Positive noise correlations between similarly tuned neurons theoretically reduce  
70 the representational capacity of the brain, yet they are commonly observed,  
71 emerge dynamically in complex tasks, and persist even in well-trained animals.  
72 Here we show that such correlations, when embedded in a neural population with  
73 a fixed signal to noise ratio, can improve the speed and robustness with which an  
74 appropriate readout is learned. In a simple discrimination task such correlations  
75 can emerge naturally through Hebbian learning. In more complex tasks that  
76 require multiple discriminations, correlations between neurons that similarly  
77 encode the task-relevant feature improve learning by constraining it to the  
78 appropriate task dimension.

79

80

81 **Introduction:**

82

83 The brain represents information using distributed population codes in which  
84 particular feature values are encoded by large numbers of neurons. One  
85 advantage of such codes is that a pooled readout across many neurons can  
86 effectively reduce the impact of stimulus-independent variability (noise) in the  
87 firing of individual neurons (Pouget et al., 2000). However, the extent to which  
88 this benefit can be employed in practice is constrained by noise correlations, or  
89 the degree to which stimulus-independent variability is shared across neurons in

90 the population (Averbeck et al., 2006). In particular, positive noise correlations  
91 between neurons that share the same stimulus tuning can reduce the amount of  
92 decodable information in the neural population (Averbeck et al, 2006; Moreno-  
93 Bote et al., 2014; Hu et al., 2014). Despite their detrimental effect on encoding,  
94 noise correlations of this type are reliably observed, even after years of training  
95 on perceptual tasks (Cohen and Kohn, 2011). Furthermore, noise correlations  
96 between neurons are dynamically enhanced under conditions where two neurons  
97 provide evidence for the same response in a perceptual categorization task  
98 (Cohen and Newsome, 2008), raising questions about whether they might serve  
99 a function rather than simply reflecting a suboptimal encoding strategy.

100

101 At the same time, learning to effectively read out a distributed code also poses a  
102 significant challenge. Learning the appropriate weights for potentially tens of  
103 thousands of neurons in a low signal-to-noise regime is a difficult, high-  
104 dimensional problem, requiring a very large number of learning trials and  
105 entailing considerable risk of “over fitting” to specific patterns of noise  
106 encountered during learning trials. Nonetheless, people and animals can rapidly  
107 learn to perform perceptual discrimination tasks, albeit with performance that  
108 does not approach theoretically achievable levels (Hawkey et al., 2004; Stringer  
109 et al., 2019). In comparison, deep neural networks capable of achieving human  
110 level performance typically require a far greater number of learning trials than  
111 would be required by humans and other animals (Tsividis et al., 2017). This  
112 raises the question of how brains might implement inductive biases to enable  
113 efficient learning in high dimensional spaces.

114

115 Here we address open questions about noise correlations and learning by  
116 considering the possibility that noise correlations facilitate faster learning.  
117 Specifically, we propose that noise correlations aligned to task relevant  
118 dimensions could reduce the effective dimensionality of learning problems,  
119 thereby making them easier to solve. For example, perceptual stimuli often  
120 contain a large number of features that may be irrelevant to a given  
121 categorization. At the level of a neural population, individual neurons may differ in  
122 the degree to which they encode task irrelevant information, thus making the  
123 learning problem more difficult. In principle, noise correlations in the relevant  
124 dimension could reduce the effects of this variability on learned readout. Such an  
125 explanation would be consistent with computational analyses of Hebbian learning  
126 rules (Oja, 1982), which can both facilitate faster and more robust learning  
127 (Krotov and Hopfield, 2019), and in turn may induce noise correlations. We  
128 propose that faster learning of an approximate readout is made possible through  
129 low dimensional representations that share both signal and noise across a large  
130 neural population. In particular, we hypothesize that representations  
131 characterized by enhanced noise correlations among similarly tuned neurons can  
132 improve learning by focusing adjustments of the readout onto task relevant  
133 dimensions.

134

135 We explore this possibility using neural network models of a two-alternative  
136 forced choice perceptual discrimination task in which the correlation among  
137 similarly tuned neurons can be manipulated independently of the overall  
138 population signal-to-noise ratio. Within this framework, noise correlations, which  
139 can be learned through Hebbian mechanisms, speed learning by forcing learned  
140 weights to be similar across pools of similarly tuned neurons, thereby ensuring  
141 learning occurs over the most task relevant dimension. We extend our framework  
142 to a cued multidimensional discrimination task and show that dynamic noise  
143 correlations similar to those observed in vivo (Cohen and Newsome, 2008),  
144 speed learning by constraining weight updates to the relevant feature space. Our  
145 results demonstrate that when information is extrinsically limited, noise  
146 correlations can make learning faster and more robust by controlling the  
147 dimensions over which learning occurs.

148

149

## 150 **Materials and Methods:**

151 Our goal was to understand the computational principles through which  
152 correlations in the activity of similarly tuned neurons affect the speed with which  
153 downstream neurons could learn an effective readout. Previous work has  
154 demonstrated that manipulating noise correlations while maintaining a fixed  
155 variance in the firing rates of individual neurons leads to changes in the  
156 theoretical encoding capacity of a neural population (Averbeck et al., 2006;  
157 Moreno-Bote et al., 2014). To minimize the potential impact of such encoding  
158 differences, we took a different approach; rather than setting the variance of  
159 individual neurons in our population to a fixed value, we set the signal-to-noise  
160 ratio of our population to a fixed value. Thus, our approach does not ask how  
161 maximum information can be packed into a given neural population's activity, but  
162 rather how the strategy for packing a *fixed* amount of information in a population  
163 affects the speed with which an appropriate readout of that information can be  
164 learned. We implement this approach in a set of neural networks described in  
165 more detail below.

### 166 *Learning readout in perceptual learning task*

167 Simulations and analyses for a simple perceptual discrimination task were  
168 performed with a simplified and statistically tractable two-layer feed-forward  
169 neural network (figure 3A). The input layer consisted of two homogenous pools of  
170 100 units that were each identically "tuned" to one of two motion directions (left,  
171 right). On each trial normalized firing rates for the neural population were drawn  
172 from a multivariate normal distribution that was specified by a vector of stimulus-  
173 dependent mean firing rates (signal: +1 for preferred stimulus, -1 for non-  
174 preferred stimulus) and a covariance matrix. All elements of the covariance  
175 matrix corresponding to covariance between units that were "tuned" to different

176 stimuli were set to zero. The key manipulation was to systematically vary the  
177 magnitude of diagonal covariance components (eg. noise in the firing of  
178 individual units) and the “same pool” covariance elements (eg. shared noise  
179 across identically tuned neurons) while maintaining a fixed level of variance in  
180 the summed population response for each pool:

$$181 \quad \sigma_{pool}^2 = n\sigma_{unit}^2 + n(n-1)Cov(\text{within pool}) \quad Eq. 1$$

182 Where  $\sigma_{pool}^2$  is the variance on the sum of normalized firing rates from neurons  
183 within a given pool,  $n$  is the number of units in the pool and the within pool  
184 covariance ( $Cov(\text{within pool})$ ) specifies the covariance of pairs of units  
185 belonging to the same pool. Signal-to-noise ratio (SNR) was defined as the  
186 population signal (preferred-antipreferred) divided by the standard deviation of  
187 the population response in the signal dimension. SNR was set to be 2 for each  
188 individual pool of neurons, leading to a signal-to-noise ratio for the entire  
189 population (both pools) equal to  $2\sqrt{2}$ . Given this constraint, the fraction of noise  
190 that was shared across neurons within the same pool was manipulated as  
191 follows:

$$192 \quad \sigma_{unit}^2 = \frac{\sigma_{pool}^2}{n + n(n-1)\phi} \quad Eq. 2$$

$$194 \quad Cov(\text{within pool}) = \phi\sigma_{unit}^2 \quad Eq. 3$$

195 Where  $\phi$  reflects the fraction of noise that is correlated across units, which we  
196 refer to in the text as noise correlations. Noise correlations ( $\phi$ ) were manipulated  
197 across values ranging from 0 to 0.2 for simulations. Note that, since  $\phi$  appears in  
198 the denominator of equation 2, adding noise correlations while sustaining a fixed  
199 population signal-to-noise ratio leads to lower variance in the firing rates of single  
200 neurons, differing from previous theoretical assumptions (compare figure 2a&b).

201  
202 The input layer of the neural network was fully connected to an output layer  
203 composed of two output units representing left and right responses. Output units  
204 were activated on a given trial according to a weighted function of their inputs:

$$205 \quad F_{output} = wF_{input} \quad Eq. 4$$

206  
207  
208 Where  $F_{output}$  is a vector of firing rates of output units,  $F_{input}$  is a vector of firing  
209 rates of the input units, and  $w$  is the weight matrix. Firing of an individual output  
210 unit can also be written as a weighted sum over input unit activity:

211

212 
$$F_j = \sum_{i=1}^{200} w_{i,j} F_i \quad Eq. 5$$

213  
214 where  $F_j$  reflects the firing of the  $j^{\text{th}}$  output unit,  $F_i$  reflects the firing of the  $i^{\text{th}}$  input  
215 unit, and  $w_{i,j}$  reflects the weight of the connection between the  $i^{\text{th}}$  input unit and  
216 the  $j^{\text{th}}$  output unit. Actions were selected as a softmax function of output firing  
217 rates:  
218

219 
$$p(A_j) = \frac{e^{\beta F_j}}{\sum_k e^{\beta F_k}} \quad Eq. 6$$

220 where  $\beta$  is an inverse temperature, which was set to a relatively deterministic  
221 value (10000). Learning was implemented through reinforcement of weights to  
222 the selected output neuron (subscripted  $j$  below):  
223

224 
$$\Delta w_{i,j} = \alpha \delta F_i \quad Eq. 7$$

225 Where  $F_i$  is the normalized firing rate of the  $i^{\text{th}}$  input neuron,  $\delta$  is the reward  
226 prediction error experienced on a given trial [+0.5 for correct trials and -0.5 for  
227 error trials], and  $\alpha$  is a learning rate (set to 0.0001 for simulations in figure 2). The  
228 network was trained to correctly identify two stimuli (each of which was preferred  
229 by a single pool of input neurons) over 100 trials (the last 20 trials of which were  
230 considered testing). Simulations were repeated 1000 times for each level of  $\phi$   
231 and performance measures were averaged across all repetitions. Mean accuracy  
232 per trial across all simulations was convolved with a Gaussian kernel (standard  
233 deviation = 0.5 trials) for plotting in figure 2b. Mean accuracy across the final 20  
234 trials was used as a measure of final accuracy (figure 2e). Statistics on model  
235 performance were computed as Pearson correlations between noise correlations  
236  $\phi$  and performance measures across all simulations and repetitions.

### 237 *Analytical learning trajectories*

238 One advantage of our simple network architecture is its mathematical tractability.  
239 To complement the simulations described above, we also explored learning in  
240 the network analytically. Specifically, we decomposed weight updates into two  
241 categories: weight updates in the signal dimension, and weight updates  
242 perpendicular to the signal dimension. Weight updates in the signal dimension  
243 improved performance through alignment with the signal itself, whereas weight  
244 updates in the perpendicular dimension limited performance through chance

245 alignment with trial-to-trial noise. An intuition for our approach and derivation are  
246 provided below.

247

248 The two-alternative discrimination task is a one dimensional signal detection  
249 problem, because it depends only on the difference between two scalars. In  
250 particular, if  $y = [y_1, y_2]$  denotes the readout activity the pair of pools and  $r$   
251 denotes the response (e.g.  $r=-1$  is “respond left” and  $r=1$  is “respond right”), then  
252  $r = r(y_1 - y_2) = r(\Delta y)$ . In addition,  $\Delta y = w_1 x - w_2 x \equiv \Delta w x$ , where  $x$  reflects  
253 the firing rates of the input units and  $w_1$  reflects the vector of weights mapping  
254 input activation onto output unit 1 ( $y_1$ ). To determine how accuracy is impacted  
255 by noise correlations, we ask how Mahalanobis distance ( $d'$ ), mean separation  
256 ( $d$ ), and signal variance ( $\sigma_{s*}^2$ ) diverge over training time for the different noise  
257 correlation conditions. The effective variance,  $\sigma_{s*}^2$ , differs from the true noise  
258 variance in the signal dimension due to the fact that out-of-signal-dimension  
259 noise is transferred into the signal dimension by imperfect readout weights.  
260 Intuitively, learning speed may be improved by noise correlations because less  
261 out-of-dimension noise is “learned into” the weights, thereby reducing the transfer  
262 out-of-dimension noise into the signal space on any given trial.

263

264 The logic of training is as follows: On a correct trial, the weights to the chosen  
265 unit are incremented by a multiple of the input vector  $x$ . That is:

266

$$267 \quad w_i \rightarrow w_i + \alpha \delta x \quad \text{Eq. 8}$$

268

269 Here  $\alpha$  reflects a positive learning rate,  $x$  reflects the activity of the input units and  
270  $\delta$  is the reward prediction error, which we use as the absolute reward prediction  
271 error instead of the signed one in this section for convenience.

272

273 Now the input is a sum of signal and zero mean noise:

274

$$275 \quad x = \mu + \xi \quad \text{Eq. 9}$$

276

277 The expectation of noise is zero ( $E(\xi) = 0$ ) and the signal  $\mu$  can take only two  
278 values  $\mu \in \{\pm \mu_0\}$ . Therefore if the weights start from some value  $\Delta w(0)$ , we will  
279 find that:

280

$$281 \quad E[\Delta w(t)] = t \alpha \delta \mu_0 + \Delta w(0) \quad \text{Eq 10}$$

282

283 Where  $t$  reflects the current timestep of learning. In words, we expect the amount  
284 of signal in the weights to increase linearly over time. This means that we expect  
285 the response to a noise-free signal ( $\mu_0$ ) after  $t$  timesteps to be:

286

$$287 \quad \Delta y(\mu_0, t) = \Delta w(t) \mu_0 + \Delta w_0 \mu_0 = t \alpha \delta |\mu_0|^2 + \Delta w_0 \mu_0 \quad \text{Eq. 11}$$

288



289 This is the measure  $d$  between the two Gaussian peaks in the one dimensional  
290 signal detection problem described above. Below, we ignore the initial weight  
291 term, since it does not change over time. To compute accuracy and  $d'$  over  
292 training time we also need to compute the effective variance along the signal  
293 dimension. First we note that the noise can be decomposed as:

294

$$295 \quad \xi = \xi_s + \xi_{\perp} \quad Eq. 12$$

296

297 where  $\xi_s$  and  $\xi_{\perp}$  are orthogonal components of the noise in the signal dimension  
298 ( $\xi_s$ ) and perpendicular to the signal dimension ( $\xi_{\perp}$ ). Here we consider cases  
299 where the noise along the signal dimension ( $\xi_s$ ) has constant variance, following  
300 on the assumptions that SNR is set to a constant value and that the mean signal  
301 is the same for all noise correlation conditions.

302

303 The difference  $\Delta y$  on any given trial decomposes into a sum of terms, one  
304 reflecting weight-based transfer of signal and one reflecting the transfer of  
305 orthogonal noise. This latter term arises because the weights are not, at any  
306 finite time, a perfect matched filter for the signal. Letting subscripts  $s$  and  $\perp$   
307 continue to denote “signal” and “perpendicular” dimensions, we have:

308

$$309 \quad \Delta y = \Delta w x \quad Eq. 13$$

310

$$311 \quad \Delta y = (\Delta w_s + \Delta w_{\perp})(\mu + \xi_s + \xi_{\perp}) \quad Eq. 14$$

312

$$313 \quad \Delta y = \Delta w_s (\mu + \xi_s) + \Delta w_{\perp} \xi_{\perp} \quad Eq. 15$$

314 where the final equation reflects the absence of terms that have zero products by  
315 definition of the perpendicular subspaces. The variance of  $\Delta y$  can be computed  
316 using independence and orthogonality properties:

317

$$318 \quad Var(\Delta y) = Var(\Delta w_s (\mu + \xi_s) + \Delta w_{\perp} \xi_{\perp}) \quad Eq. 16$$

319

$$320 \quad Var(\Delta y) = \Delta w_s^2 E[\xi_s^2] + \Delta w_{\perp}^2 E[\xi_{\perp}^2] \quad Eq. 17$$

321

322

323 For any given network, the term  $\Delta w(t)_{\perp}^2$  is a mean-zero diffusion process arising  
324 from the fact that noise is added to the weights at every time step. For the  
325 Gaussian white noise case,  $\Delta w(t)_{\perp}^2$  is equivalent to Brownian motion in the (n-1)  
326 dimensions perpendicular to the signal. Because (n-1) is not small, the summed  
327 empirical variance of these processes, operative on each component, is likely to  
328 be close to the theoretical total variance. If we split the term  $\Delta w(t)_{\perp}^2$  into the (n-1)  
329 components and index them with  $i$ , this gives:

330



331

$$\Delta w_{\perp}^i = \alpha \delta \sqrt{\frac{t}{n-1}} \sigma_{\perp} \quad Eq. 18$$

332

333 The denominator of (n-1) appears here because Brownian motion determines  
 334 growth in the variance of each of the (n-1) perpendicular noise directions among  
 335 which the total variance  $\sigma_{\perp}$  is distributed. Technically, our manipulation of the  
 336 noise covariance fixes the variance in a second direction of the space as well, so  
 337 that noise variance is actually evenly distributed over only (n-2) of the (n-1)  
 338 perpendicular dimensions, but this inhomogeneity is inconsequential if n is not  
 339 small; In effect, we are ignoring an order 1 term relative to an order n term for  
 340 simplicity. In order to understand how perpendicular weights grow with time, we  
 341 need only to determine  $\sigma_{\perp}(\phi)$ , where  $\phi$  is the parameter controlling the noise  
 342 covariance matrix in our simulations. Specifically, the first row of the covariance  
 343 matrix takes the form:

344

$$\Sigma(\xi)_1 = [b, \phi b, \phi b, \dots, \phi b, 0, \dots, 0] \quad Eq. 19$$

345

346 Using the additional fact that row-sums are set to  $\sigma_s^2$  to control the signal  
 347 variance, we find that:

348

$$b + \left(\frac{n}{2} - 1\right) \phi b = \sigma_s^2 \quad Eq. 20$$

349

$$b = \frac{2\sigma_s^2}{2 + (n-2)\phi} \quad Eq. 21$$

350

351 Since the eigenvalues of  $\Sigma(\xi)$  are the variances in different dimensions of the  
 352 space, we can find the total variance perpendicular to the signal by subtracting  
 353 the known signal variance from the trace of  $\Sigma(\xi)$ :

354

$$\sigma_{\perp}^2 = Var(\xi_{\perp}) = Tr(\Sigma(\xi)) - Var(\xi_s) \quad Eq. 22$$

355

$$\sigma_{\perp}^2 = Var(\xi_{\perp}) = nb - \sigma_s^2 \quad Eq. 23$$

356

357 Putting this together with previous results, we have:

358

$$Var(\Delta y) = (t\alpha\delta\mu\sigma_s)^2 + \frac{t(\alpha\delta)^2\sigma_{\perp}^4}{n-1} \quad EQ 24$$

359

360 This provides analytic prediction for the variance of our readout decision variable  
 361  $\Delta y$  after learning for t trials, using a learning rate  $\alpha$  to learn from prediction  
 362 errors of magnitude  $\delta$ . Note that  $\sigma_s$  was fixed in our simulations, but that  $\sigma_{\perp}^4$   
 363 depends on  $\phi$  through b, such that larger values of  $\phi$  lead to smaller values of b,

370 and thus a smaller  $\sigma_1^2$ , reducing the second term in Eq 24. Furthermore, since the  
371 first term in Eq 24 scales with  $t^2$  its contributions dominate as more trials are  
372 observed. This leads to identical asymptotic variance in the limit of large  $t$ , since  
373 the first term does not depend on  $\phi$ .

374

375 By combining the mean and variance information in Equations 11 and 24 we  
376 computed accuracy as one minus the cumulative probability density of the  
377 Gaussian distribution  $N(t\alpha\delta||\mu_0||^2, (t\alpha\delta\mu\sigma_s)^2 + \frac{t(\alpha\delta)^2\sigma_1^4}{n-1})$  evaluated from  
378 negative infinity to zero.

379

### 380 *Noise correlations with fixed signal-to-noise ratio and single unit variance*

381 Noise correlations produced by the simulations above lead to reductions in the  
382 overall variance of single unit firing rates. In order to validate that our results  
383 depend on maintaining signal-to-noise, rather than depending on single-unit  
384 variance, we also consider the case where noise correlations are introduced with  
385 a fixed level of single unit variance. In this case, signal-to-noise ratio was  
386 maintained by scaling the amount of signal according to the level of noise  
387 correlations (see <https://github.com/NassarLab/NoiseCorrelation> for full derivation):

388

$$389 \quad S_{neuron} = \sqrt{\frac{\sigma_{unit}^2 (1 + (n - 1)\phi)}{n}} \quad Eq. 25$$

390

391 where  $S_{neuron}$  reflects the amount of signal provided by each unit,  $\sigma_{unit}^2$  reflects a  
392 fixed variance assigned to each unit,  $n$  reflects the number of units in the pool,  
393 and  $\phi$  reflects the level of noise correlations. Thus, when we simulated correlated  
394 noise using this equation, neurons maintained the same variance ( $\sigma_{unit}^2$ ), but  
395 increased their signal relative to the zero noise correlation condition ( $\phi = 0$ ).

396

### 397 *Noise correlations that are bounded to a maximum signal-to-noise ratio*

398

399 In order to examine the importance of our assumption regarding fixed signal-to-  
400 noise ratio, we also considered a parameterized model where signal ( $S_{neuron}$ )  
401 was set according to a linear mixture:

402

$$403 \quad S_{neuron} = m \sqrt{\frac{\sigma_{unit}^2 (1 + (n - 1)\phi)}{n}} + (1 - m) \sqrt{\frac{\sigma_{unit}^2}{n}} \quad Eq. 26$$

404

405 where  $m$  is a mixing parameter that combines the signal producing a fixed signal-  
406 to-noise ratio (first term) with a fixed signal that does not depend on the level of  
407 noise correlations (second term). When  $m$  is set to 1, this parameterized model

408 obeys our assumptions regarding fixed signal to noise ratio, but when  $m$  is set to  
409 0, the model conforms to more standard assumptions regarding fixed single unit  
410 variance and signal.  
411

#### 412 *Hebbian learning of noise correlations in three-layer network*

413 We extended the two-layer feed-forward architecture described above to include  
414 a third hidden layer in order to test whether Hebbian learning could facilitate  
415 production of noise correlations among similarly tuned neurons (figure 5A). The  
416 input layer was fully connected to the hidden layer, and each layer contained 200  
417 neurons. In the input layer, neurons were homogenously tuned (100 leftward,  
418 100 rightward) as described above, with  $\phi$  set to zero (eg. no noise correlations).  
419 Weights to the hidden layer were initialized to favor one-to-one connections  
420 between input layer units and hidden layer units by adding a small normal  
421 random weight perturbation (mean=0, standard deviation = 0.01) to an identity  
422 matrix (though an alternate initialization was used to produce figure 6-1). During  
423 learning, weights between the input and hidden layer were adjusted according to  
424 a normalized Hebbian learning rule:

425

$$426 \quad \Delta W = \alpha_{hebb} \mathbf{F}'_1 \mathbf{F}_2 \quad Eq. 27$$

427

428 Where  $\mathbf{F}'_1$  is a normalized vector of firing rates corresponding to the input layer  
429 and  $\mathbf{F}_2$  is a normalized vector of firing rates corresponding to the hidden layer  
430 units. The learning rate for Hebbian plasticity ( $\alpha_{hebb}$ ) was set to 0.00005 for  
431 simulations in figure 4 and 0.0005 for simulations in figure extended data figure  
432 6-1. Weights were normalized after Hebbian learning to ensure that the  
433 Euclidean norm of the incoming weights to each unit in layer two was equal to  
434 one. The model was “trained” over 100 trials in the same perceptual  
435 discrimination task described above and an additional 100 trials of the task were  
436 completed to measure emergent noise correlations in the hidden layer. Noise  
437 correlations were measured by regressing out variance attributable to the  
438 stimulus on each trial, and then computing the Pearson correlation of residual  
439 firing rate across each pair of neurons for the 100 testing trials (figure 4B&C).  
440

#### 441 *Learning readout in multiple discrimination task*

442 In order to test the impact of contextual noise correlations on learning (Cohen  
443 and Newsome, 2008), the perceptual discrimination task was extended to include  
444 two dimensions and two interleaved trial types: one in which an up/down  
445 discrimination was performed (vertical), and one in which a right/left  
446 discrimination was performed (horizontal). Each trial contained motion on the  
447 vertical axis (up or down) and on the horizontal axis (left or right), but only one of  
448 these motion axes was relevant on each trial as indicated by a cue.

449

450 In order to model this task, we extended our two-layer feed-forward network to  
451 include 4 pools of input units, 4 output units, and 2 task units (figure 5A). Each  
452 homogenous pool of 100 input units encoded a conjunction of the movement  
453 directions (up-right, up-left, down-right, down-left). On each trial, the mean firing  
454 rate of each input unit population was determined according to their tuning  
455 preferences:

456

457

458

$$\mu = V + H \quad Eq. 28$$

459

460 where V was +1/-1 for trials with the preferred/anti-preferred vertical motion  
461 direction H was +1/-1 for trials with the preferred/anti-preferred horizontal motion  
462 direction. Firing rates for individual neurons were sampled from a multivariate  
463 Gaussian distribution with mean  $\mu$  and a covariance matrix that depended on trial  
464 type (vertical versus horizontal) and the level of same pool, relevant pool, and  
465 irrelevant pool correlations.

466

467 In order to create a covariance matrix, we stipulated a desired standard error of  
468 the mean for summed population activity (SEM=20 for simulations in figure 5)  
469 and determined the summed population variance that would correspond to that  
470 value ( $\sigma_{pool}^2$ ). We then determined the variance on individual neurons that would  
471 yield this population response under a given noise correlation profile as follows:

472

473

$$\sigma_{unit}^2 = \frac{\sigma_{pool}^2}{n + n(n-1)\phi_{same} + n^2\phi_{relevant} - n^2\phi_{irrelevant}} \quad Eq. 29$$

474

475 where  $\phi_{same}$  is the level of same pool correlations (range: 0-0.2 in our  
476 simulations),  $\phi_{relevant}$  is the level of relevant pool correlations (range: 0-0.2 in our  
477 simulations),  $\phi_{irrelevant}$  is the level of irrelevant pool correlations (range: 0-0.2 in  
478 our simulations. Note that increasing the same pool or in pool correlations  
479 reduces the overall variance in order to preserve the same level of variance on  
480 the task relevant dimension in the population response, but that increasing  
481 irrelevant pool correlations has the opposite effect. Covariance elements of the  
482 covariance matrix were determined as follows:

483

484

$$Cov(same\ pool) = \phi_{same}\sigma_{unit}^2 \quad Eq. 30$$

485

$$Cov(relevant\ pool) = \phi_{relevant}\sigma_{unit}^2 \quad Eq. 31$$

486

$$Cov(irrelevant\ pool) = \phi_{irrelevant}\sigma_{unit}^2 \quad Eq. 32$$

487 Variance and covariance values above were used to construct a covariance  
488 matrix for each trial type (vertical/horizontal) as depicted in figure 1.  
489

### Covariance matrix: vertical trials

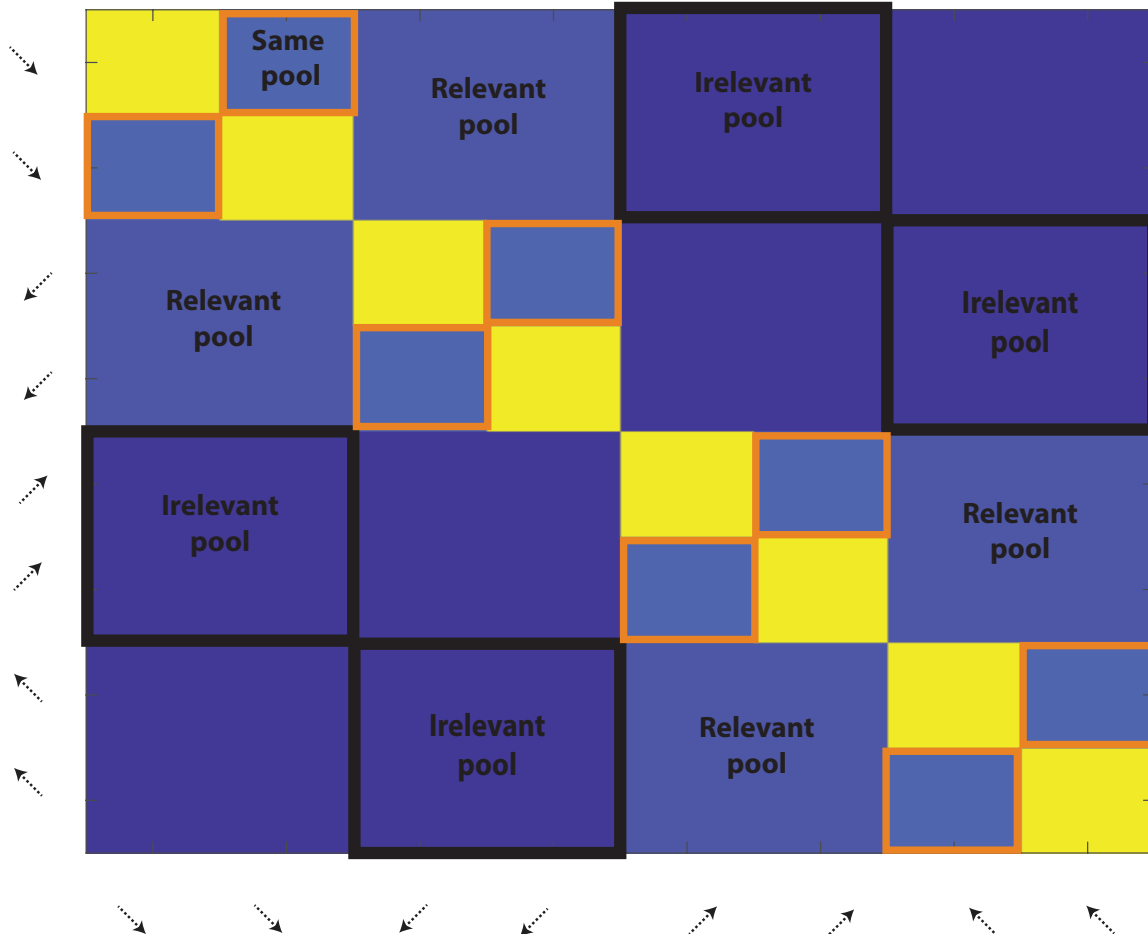

490  
491 **Figure 1: Schematic of covariance matrix for two-dimensional motion discrimination task.**  
492 The covariance between units with different motion tuning (reflected by the arrows labeling  
493 columns and rows) is schematically represented for a simplified input layer, where only two  
494 identically tuned neurons are in each pool (in actual simulations there were 100 units per pool).  
495 Same pool correlations are controlled by covariance elements between neurons with identical  
496 tuning (orange boxes). Relevant pool correlations are controlled by covariance elements between  
497 neurons that are similarly tuned to the task-relevant feature. Task irrelevant correlations are  
498 controlled by covariance elements between neurons that are similarly tuned to the task-irrelevant  
499 feature. The covariance matrix shown here is for a vertical trial – on a horizontal trial the irrelevant  
500 pool and relevant pool locations would be reversed. Covariance elements for pairs of neurons  
501 that differed in tuning on both dimensions were set to zero. Each input population has been  
502 depicted as two units here for presentation purposes. Background color reflects the case where  
503 same pool correlations = 0.2 and relevant pool correlations = 0.1.  
504  
505

506 Output units corresponded to the four possible task responses (up, down, left,  
507 right) and were activated according to a weighted sum of their inputs as

508 described previously. Task units were modeled as containing perfect information  
509 about the task cue (vertical versus horizontal) and each task unit projected with  
510 strong fixed weights (1000) to both responses that were appropriate for that task.  
511 Decisions were made on each trial by selecting the output unit with the highest  
512 activity level. Weights to chosen output unit were updated using the same  
513 reinforcement learning procedure described in the two alternative perceptual  
514 learning task.

515

516

517

## 518 **Results:**

519

520 We examine how noise correlations affect learning in a simplified neural network  
521 where the appropriate readout of hundreds of weakly tuned units is learned over  
522 time through reinforcement. In order to isolate the effects of noise correlations on  
523 learning, rather than their effects on other factors such as representational  
524 capacity, we consider population encoding schemes at the input layer that can be  
525 constrained to a fixed signal-to-noise ratio. This assumption differs from previous  
526 work on noise correlations where the *variance* of the neural population is  
527 assumed to be fixed and covariance is changed to produce noise correlations,  
528 thereby affecting the representational capacity of the population (figure 2A;  
529 (Averbeck et al., 2006; Moreno-Bote et al., 2014)). Under our assumptions, a  
530 fixed signal-to-noise ratio can be achieved for any level of noise correlations by  
531 scaling the variance (figure 2B; equations 1-3), or, alternately scaling the  
532 magnitude of the signal (equation 25). While we do not discount the degree to  
533 which noise correlations affect the encoding potential of neural populations, we  
534 believe that in many cases the relevant information is limited by extrinsic factors  
535 (eg. the stimulus itself, or upstream neural populations providing input (Ecker et  
536 al., 2011; Beck et al., 2012; Kanitscheider et al., 2015)). Under such conditions,  
537 reducing noise correlations can increase information only until it saturates  
538 because all of the available incoming information is encoded. Beyond that,  
539 increasing encoding potential is not possible as it would be tantamount to the  
540 population “creating new information” that was not communicated by inputs to the  
541 population. Therefore, our framework can be thought of as testing how best to  
542 format limited available information in a neural population in order to ensure that  
543 an acceptable readout can be rapidly and robustly learned.

544

545 We propose that within this framework, noise correlations of the form that have  
546 previously been shown to limit encoding are beneficial because they constrain  
547 learning to occur over the most relevant dimensions. In general, a linear readout  
548 can be thought of as hyperplane serving as a classification boundary in an N  
549 dimensional space, where N reflects the number of neurons in a population.  
550 Learning in such a framework involves adjustments of the hyperplane to  
551 minimize classification errors. The most useful adjustments are in the dimension

552 that best discriminates signal from noise (central arrows in figure 2C&D), but  
553 adjustments may also occur in dimensions orthogonal to the relevant one (such  
554 as “twisting” of the hyperplane depicted by curved arrows in figure 2C&D) that  
555 could potentially impair performance, or slow down learning. Our motivating  
556 hypothesis is that by focusing population activity into the task relevant dimension,  
557 noise correlations can increase the fraction of hyperplane adjustments that occur  
558 in the task relevant dimension (figure 2D), thus reducing the effective  
559 dimensionality of readout learning.  
560

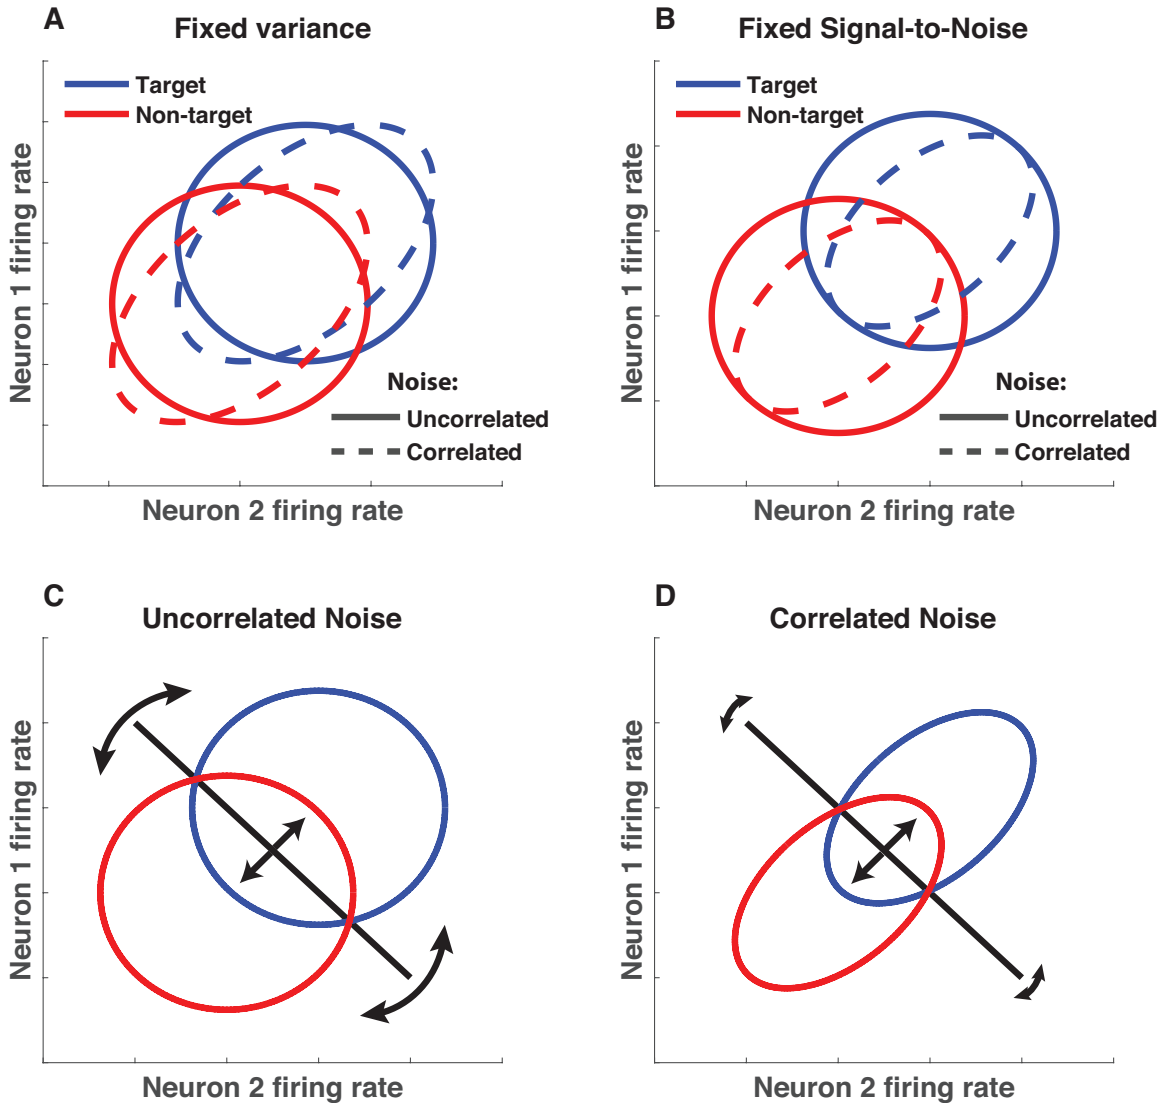

561  
562  
563  
564  
565  
566  
567  
568  
569

**Figure 2: Modeling noise correlations with extrinsic constraint on signal-to-noise ratio. A)** Previous work has modeled noise correlations by assuming that population variance is fixed and that covariance is manipulated to produce noise correlations. Under such assumptions, the firing rate of two similarly tuned neurons is plotted in the absence (solid) or presence (dotted) of information-limiting noise correlations. **B)** Here we assume that the signal-to-noise ratio of the neural population is limited to a fixed value such that noise correlations between similarly tuned



570 neurons do not affect theoretical performance. Thus, the percent overlap of blue (target) and red  
571 (non-target) activity profiles does not differ in the presence (dotted) or absence (solid) of noise  
572 correlations. **C&D**) Under this assumption, noise correlations among similarly tuned neurons  
573 could compress the population activity to a plane orthogonal to the optimal decision boundary,  
574 thereby minimizing boundary adjustments in irrelevant dimensions (**C**) and maximizing boundary  
575 adjustments on relevant ones (**D**).

576  
577

578 *Noise correlations enable faster learning in a fixed signal-to-noise regime*

579

580 In order to test our overarching hypothesis, we constructed a fully connected two-  
581 layer feed-forward neural network in which input layer units responded to one of  
582 two stimulus categories (pool 1 & pool 2) and each output unit produced a  
583 response consistent with a category perception (left/right units in figure 3A). On  
584 each trial, the network was presented with one stimulus at random, and input  
585 firing for each pool was drawn from a multivariate Gaussian with a covariance  
586 that was manipulated while preserving the population signal-to-noise ratio.  
587 Output units were activated according to a weighted average of inputs and a  
588 response was selected according to output unit activations. On each trial,  
589 weights to the selected action were adjusted according to a reinforcement  
590 learning rule that strengthened connections that facilitated a rewarded action and  
591 weakened connections that facilitated an unrewarded action (Law and Gold,  
592 2009).

593

594 Noise correlations led to faster and more robust learning of the appropriate  
595 stimulus-response mapping. All neural networks learned to perform the requisite  
596 discrimination, but neural networks that employed correlations among similarly  
597 tuned neurons learned more rapidly (figure 3B). After learning, networks that  
598 employed such noise correlations assigned more homogenous weights to input  
599 units of a given pool than did networks that lacked noise correlations (compare  
600 figure 3C&D). This led to better trained-task performance (figure 3E; Pearson  
601 correlation between noise correlations and test performance:  $R = 0.29$ ,  $p < 10e-50$ )  
602 and greater robustness to adversarial noise profiles (figure 3F;  $R = 0.81$ ,  $p <$   
603  $10e-50$ ) in the networks that employed noise correlations. Critically, these  
604 learning advantages emerged despite the fact that optimal readout of all  
605 networks achieved similar levels of performance and robustness (figure 3E&F,  
606 compare optimal readout across conditions).

607

608

609

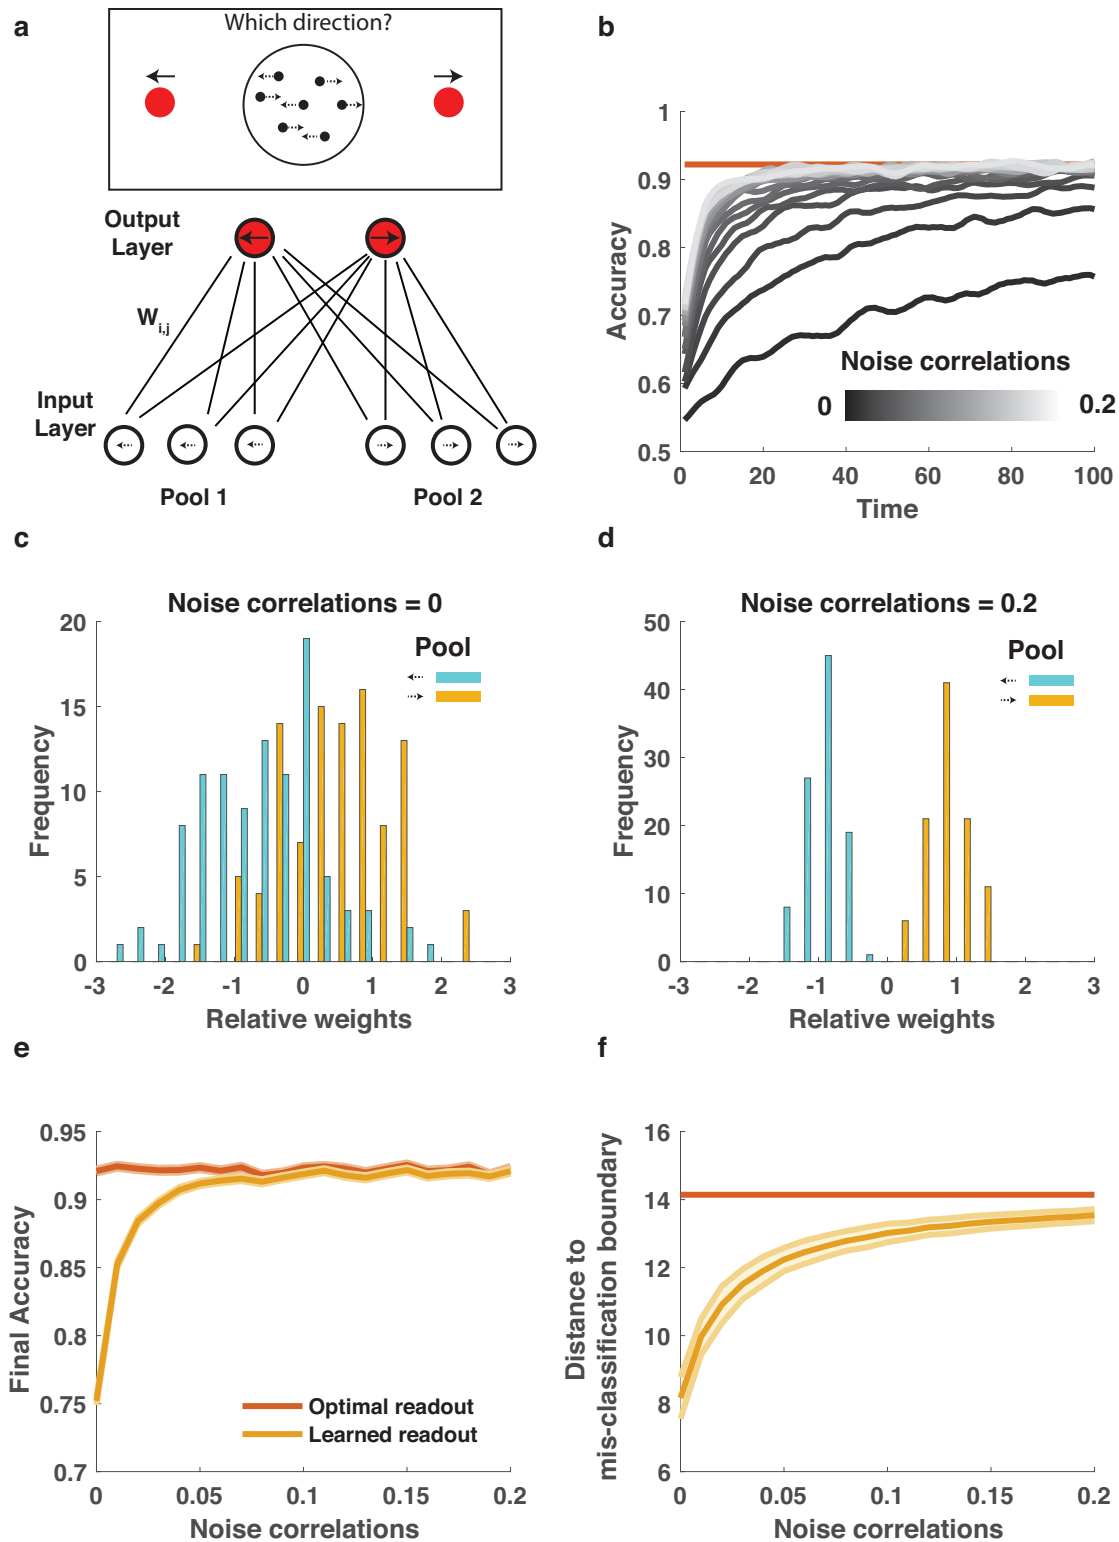

610  
 611  
 612  
 613  
 614  
 615

**Figure 3: Correlated noise within similarly tuned populations leads to faster and more robust learning of a perceptual discrimination. A)** A two-layer feed-forward neural network was designed to solve a two alternative forced choice motion discrimination task at or near

616 perceptual threshold. Input layer contains two homogenous pools of identically tuned neurons  
617 that provide evidence for alternate percepts (eg. leftward motion versus rightward motion) and  
618 output neurons encode alternate courses of actions (eg. saccade left versus saccade right).  
619 Layers are fully connected with weights randomized to small values and adjusted after each trial  
620 according to rewards (see methods). **B)** Average learning curves for neural network models in  
621 which population signal-to-noise ratio in pools 1 and 2 were fixed, but noise correlations  
622 (grayscale) were allowed to vary from small (dark) to large (light) values. **C&D)** Weight  
623 differences (left output – right output) for each input unit (color coded according to pool) after 100  
624 timesteps of learning for low (**C**) and high (**D**) noise correlations. **E)** Accuracy in the last 20  
625 training trials is plotted as a function of noise correlations for learned readouts (orange) and  
626 optimal readout (red). Lines/shading reflect Mean/SEM. **F)** The shortest distance, in terms of  
627 neural activation, required to take the mean input for a given category (eg. left or right) to the  
628 boundary that would result in misclassification is plotted for the final learned (orange) and optimal  
629 (red) weights for each noise correlation condition (abscissa). Lines/shading reflect Mean/SEM.

630  
631

632 *Learning benefits from noise correlations are greatest for large, low SNR populations.*

633

634 In order to better understand how noise correlations promoted faster learning we  
635 developed an analytical method for describing learning trajectories (see  
636 methods). Our method considered the impacts of two influences on weight  
637 updates over time: 1) weight updates in the signal dimension that tend to align  
638 with the signal and improve performance and 2) weight updates perpendicular to  
639 the signal dimension, which through chance alignment with trial-to-trial firing rate  
640 variability allow noise to impact decisions and therefore and hinder performance  
641 (fig 4a). Noise correlations implemented using our methods decreased the latter  
642 form of weight updates (fig 4b), leading updates in the signal dimension to more  
643 quickly dominate performance (fig 4c), thereby speeding analytical predictions for  
644 learning (fig 4d&e). The analytically derived learning advantage for fixed-SNR  
645 noise correlations was greatest for situations in which SNR was relatively low  
646 and neural populations were large (fig 4f).

647

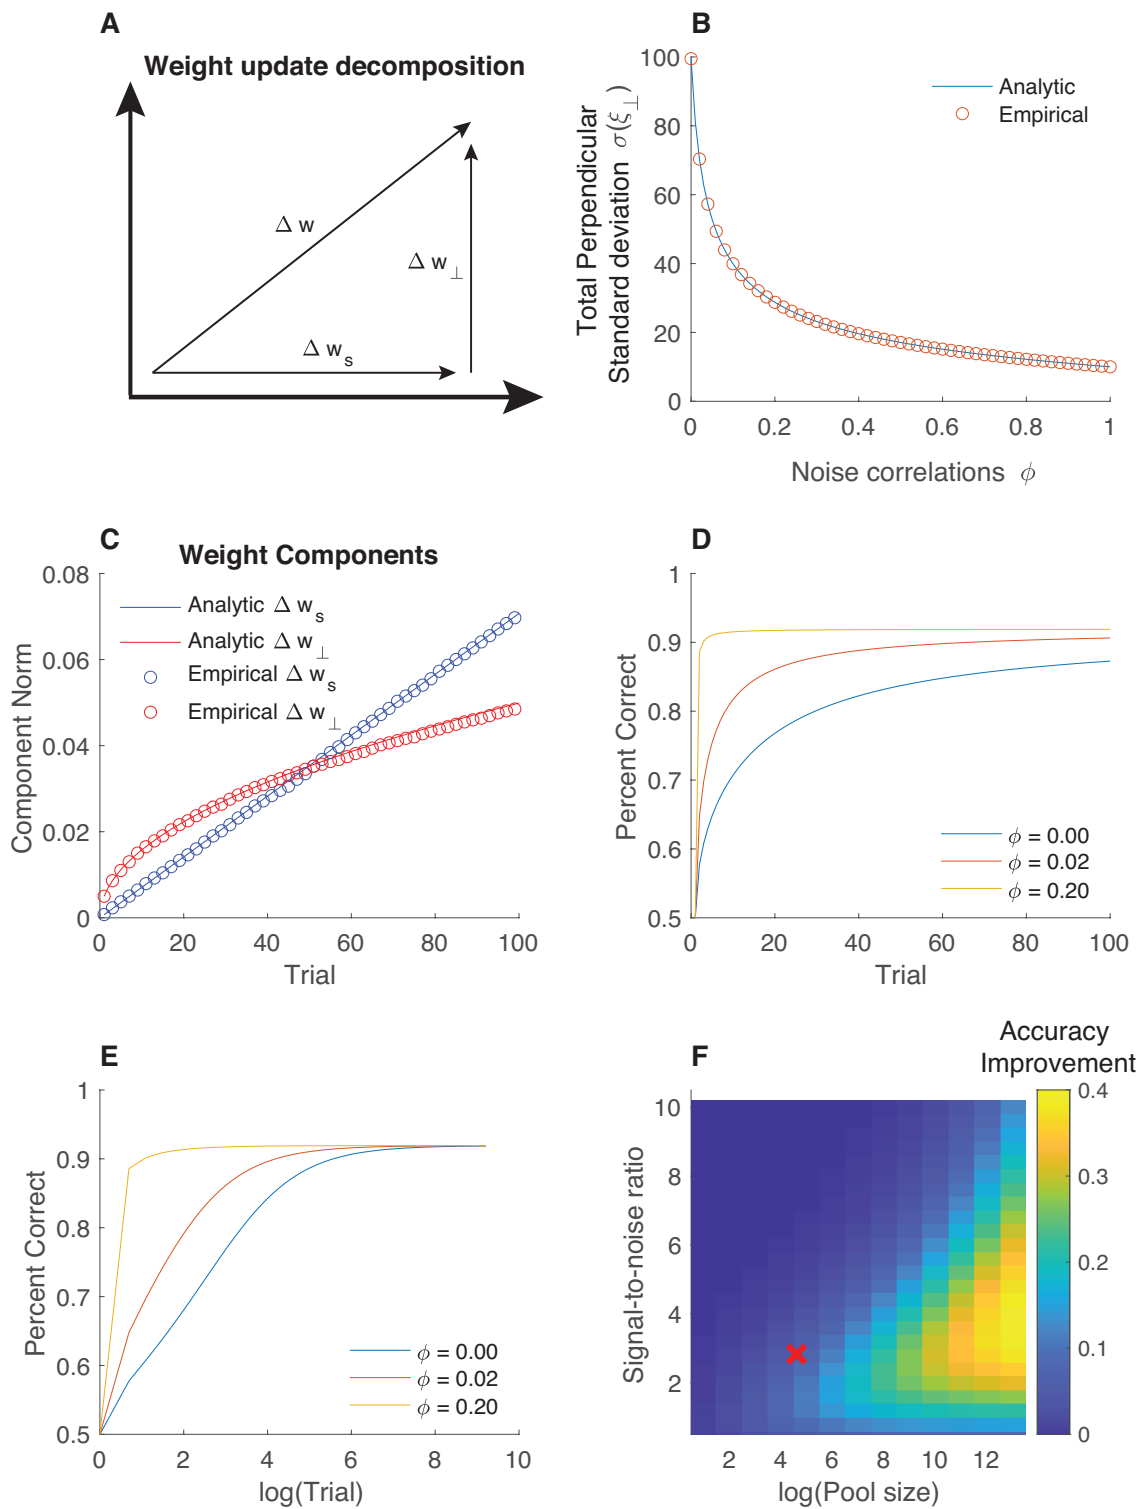

648  
649

650 **Figure 4: Analytic learning trajectories demonstrate advantage for noise correlations when**  
651 **pools are large and signal-to-noise ratio is low. A)** Our analytical approach decomposed  
652 weight updates  $\Delta w$  into two components: updates in the signal dimension ( $\Delta w_s$ )  
653 and updates perpendicular to the signal dimension ( $\Delta w_{\perp}$ ). **B)** Standard deviation of the variability  
654 in the dimension perpendicular to the signal (ordinate) decreased as a function of noise  
655 correlation (abscissa) as derived with our analytic approach (blue line, see methods), and for the  
656 empirical simulations. **C)** For a given noise correlation (0.02 in this example) learning yielded  
657 weight changes in the signal dimension (blue circles) as well in the perpendicular dimension (red  
658 circles) that could be described analytically (blue and red lines). Circles represent average values  
659 from twenty empirical simulations. **D&E)** Theoretical accuracy derived from the analytical weights  
660 reproduces learning advantages observed in our simulations for higher levels of noise  
661 correlations (compare yellow to blue curves) and demonstrates convergence with sufficient  
662 observations (**E**; note abscissa in log units). **F)** Improvement in average accuracy over first 100  
663 trials, derived analytically by taking the mean difference between yellow and blue curves in (**D**), is  
664 indicated in color across a range of signal-to-noise ratios (ordinate) and neural population sizes  
665 (abscissa). The largest learning advantages for noise correlations were observed in large neural  
666 populations that contained limited stimulus information (moderately low SNR). Red X depicts  
667 parameters used for our simulations.  
668

669 The advantage of noise correlations for learning speed did not depend on  
670 specific assumptions about whether SNR was balanced by adjusting signal or  
671 noise. We employed an alternate method for creating fixed-SNR noise  
672 correlations that amplified signal, rather than reducing variance, in order to  
673 maintain SNR for higher levels of noise correlation (equation 25). Such noise  
674 correlations could be thought of as reflecting amplification of both signal and  
675 shared noise that would result from top down recurrent feedback (Haefner et al.,  
676 2016). Under such assumptions, noise correlations sped learning and led to  
677 more robust weight profiles, similarly to in our previous simulations (Extended  
678 data Fig 3-1).

679  
680 Noise correlations that do not maintain signal-to-noise ratio can introduce a tradeoff  
681 between learning speed and asymptotic performance.

682  
683 In contrast, our learning speed results depended critically on the assumption that  
684 signal-to-noise ratio is maintained across different levels of noise correlation. In  
685 order to test this dependency, we examined performance of a family of models  
686 that contained a single parameter allowing them to range in assumptions from  
687 fixed SNR ( $m=1$ ) to fixed signal and single unit variance, analogous to  
688 assumptions of Averbeck and colleagues (Averbeck et al., 2006) ( $m=0$ ).  
689 Consistent with our previous results, noise correlations improve learning in the  
690  $m=1$  case, and consistent with Averbeck 2006, asymptotic performance is  
691 reduced by noise correlations in the  $m=0$  case (Fig 5). Interestingly, for  
692 intermediate assumptions between these two extremes, noise correlations  
693 promote faster learning improving performance in the short run, but at the cost of  
694 lower asymptotic accuracy. Thus, under such assumptions, adjusting noise  
695 correlations between similarly tuned neurons could potentially optimize a tradeoff  
696 between short-term gains from rapid learning and long term gains from higher  
697 asymptotic performance.

698

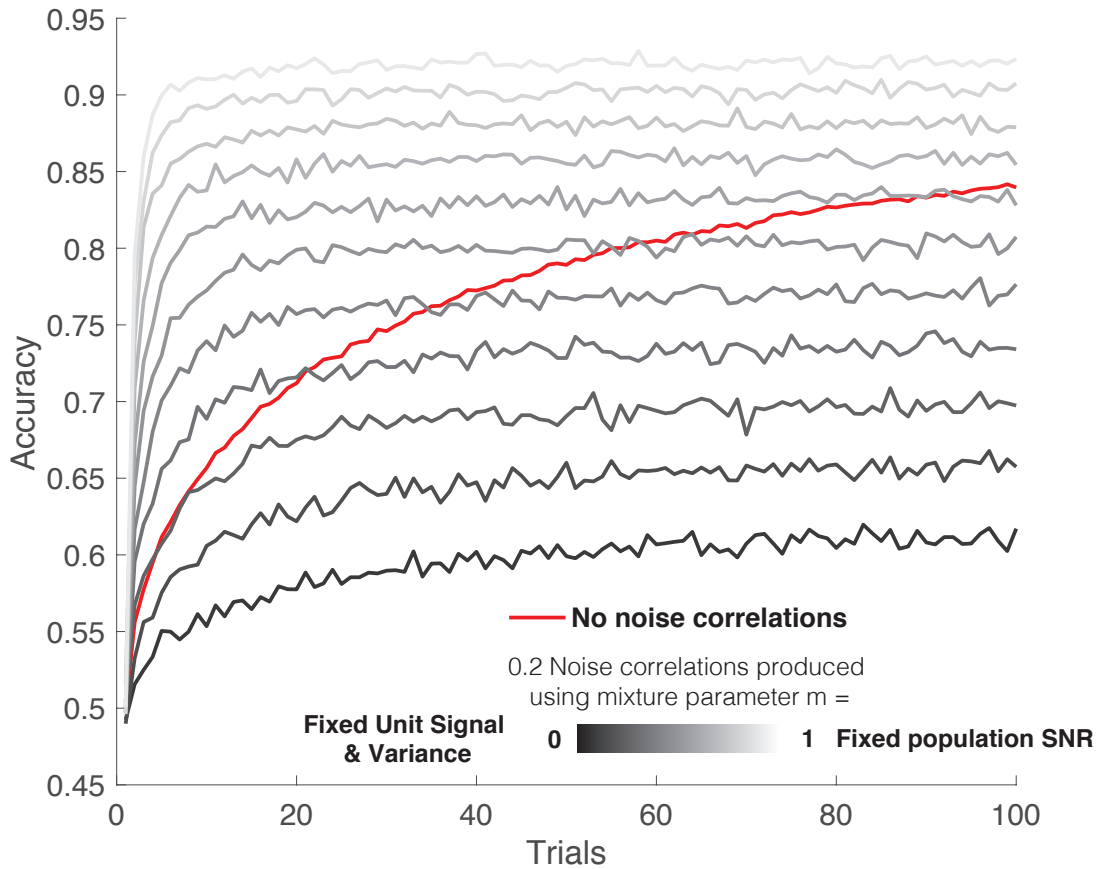

699

700

701

702

703

704

705

**Figure 5: Impact of noise correlations on learning depends on the assumption that signal-to-noise ratio is fixed.** Accuracy (ordinate) as a function of trials (abscissa) for a model without noise correlations (red) and for several models that generate noise correlations (0.2) under different assumptions. The lightest color reflects a case where signal-to-noise ratio of the population is completely preserved, analogous to our previous simulations. The darkest color

706 reflects a case where the variance and signal of individual neurons is fixed, leading to a  
707 population signal-to-noise ratio that varies as a function of noise correlations. Intermediate colors  
708 indicate parametric mixtures of these assumptions created using equation 26. Note that learning  
709 advantages depend critically on assumptions about signal-to-noise ratio, and that noise  
710 correlations implemented using intermediate assumptions introduce a tradeoff between faster  
711 learning (gray lines above red line for early trials) and lower asymptotic performance (gray lines  
712 below red line for later trials).

713  
714

715 *Hebbian learning can produce useful noise correlation structure.*

716

717 Given that noise correlations implemented in our previous simulations, like those  
718 observed in the brain, depended on the tuning of individual units, we tested  
719 whether such noise correlations might be produced via Hebbian plasticity.  
720 Specifically, we considered an extension of our neural network in which an  
721 additional intermediate layer is included between input and output neurons  
722 (figure 6a). Input units were again divided into two pools that differed in their  
723 encoding, but variability was uncorrelated across neurons within a given pool.  
724 Connections between the input layer and intermediate layer were initialized such  
725 that each input unit strongly activated one intermediate layer unit, and shaped  
726 over time using a Hebbian learning rule that strengthened connections between  
727 co-activated neuron pairs. Despite the lack of noise correlations in the input layer  
728 of this network (figure 6b; mean[std] in pool residual correlation = 0.0015[0.10]),  
729 neurons in the intermediate layer developed tuning-specific noise correlations of  
730 the form that were beneficial for learning in the previous simulations (figure 6c;  
731 mean[std] in pool residual correlation = 0.55[0.07];  $t$ -test on difference from input  
732 layer correlations  $t = 443$ ,  $dof = 19800$ ,  $p < 10e-50$ ). Hebbian learning produced  
733 analogous noise correlation structure when initialized with random weights  
734 (Extended data figure 6-1). The ability of Hebbian learning to reduce the  
735 dimensionality of the input units is consistent with previous theoretical work  
736 showing that it extracts the first principal component of the input vector, which in  
737 this case, is the signal (Oja, 1982)

738

739

740

741

742

743



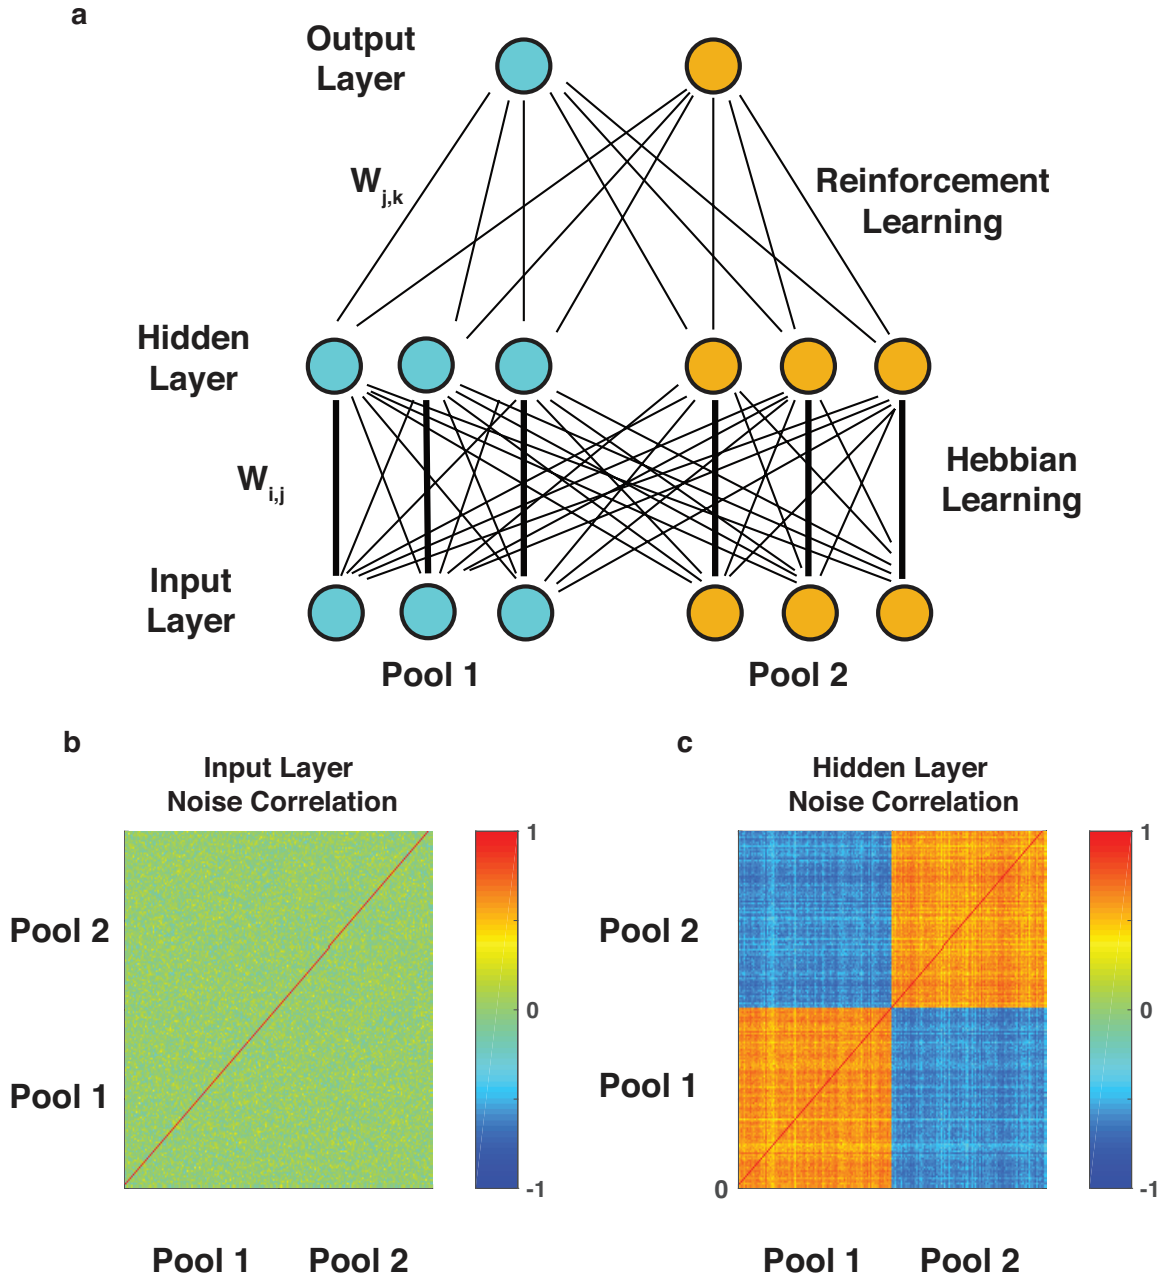

744  
745  
746  
747  
748  
749  
750  
751  
752  
753  
754  
755  
756  
757

**Figure 6: Hebbian learning produces correlations within similarly tuned populations in a perceptual discrimination task. A)** Three-layer neural network architecture. Input layer feeds forward to hidden layer, which is fully connected to an output layer. Input layer provides uncorrelated inputs to hidden layer through projection weights that are adjusted according to a Hebbian learning rule. **B&C)** Noise correlations observed in hidden layer units at the beginning (**B**) and end (**C**) of training.

758

759 *Dynamic, task-dependent noise correlations speed learning by constraining it to relevant*  
760 *feature dimensions.*

761

762 In order to understand how noise correlations might impact learning in mixed  
763 encoding populations, we extended our perceptual discrimination task to include  
764 two directions of motion discrimination (eg. up/down and left/right). On each trial,  
765 a cue indicated which of two possible motion discriminations should be  
766 performed (figure 7A, left; (Cohen and Newsome, 2008)). We extended our  
767 neural network to include four populations of one hundred input units, each  
768 population encoding a conjunction of motion directions (up-right, up-left, down-  
769 right, down-left; figure 7A; input layer). Two additional inputs provided a perfectly  
770 reliable “cue” regarding the relevant feature for the trial (figure 7A; task units).  
771 Four output neurons encoded the four possible responses (up, left, down, right)  
772 and were fully connected to the input layer (figure 7A; output layer). Task units  
773 were hard wired to eliminate irrelevant task responses, but weights of input units  
774 were learned over time as in our previous simulations.

775

776 Learning performance in the two-feature discrimination task depended not only  
777 on the level of noise correlations, but also on the type. As in the previous  
778 simulation, adding noise correlations to each individual population of identically  
779 tuned units led to faster learning of the appropriate readout (Figure 7B&C,  
780 compare blue and yellow; Figure 7D&E, vertical axis; mean[std] accuracy across  
781 training: 0.54[0.05] and 0.70[0.05] for minimum (0) and maximum (0.2) in pool  
782 correlations, t-test for difference in accuracy:  $t = 226$ ,  $dof = 19998$ ,  $p < 10e-50$ ).

783

784 However, the more complex task design also allowed us to test whether dynamic  
785 trial-to-trial correlations might further facilitate learning. Specifically, correlations  
786 that increase shared variability among units that contribute evidence to the same  
787 response have been observed previously (Cohen and Newsome, 2008), and  
788 could in principle focus learning on relevant dimensions (figure 2C&D) even  
789 when those dimensions change from trial to trial. Indeed, adding correlations  
790 among separate pools that share the same encoding of the relevant feature (eg.  
791 UP on a vertical trial) led to faster learning (figure 7B; mean[std] training  
792 accuracy for model with relevant pool correlations: 0.73[0.05], t-test for difference  
793 from in pool correlation only model:  $t = 34$ ,  $dof = 19998$ ,  $p < 10e-50$ ) and weights  
794 that more closely approached the optimal readout (figure 7E, horizontal axis). In  
795 contrast, when positive noise correlations were introduced across separate  
796 encoding pools that shared the same tuning for the irrelevant dimension on each  
797 trial (eg. UP on a horizontal trial) learning was impaired dramatically (figure 7C;  
798 mean[std] training accuracy for model with irrelevant pool correlations:  
799 0.51[0.05], t-test for difference from in pool correlation only model:  $t = -278$ ,  $dof$   
800  $= 19998$ ,  $p < 10e-50$ ) and learned weights diverged from the optimal readout  
801 (figure 7F, horizontal axis). Model performance differences were completely

802 attributable to learning the readout, as all models performed similarly when using  
803 the optimal readout (extended data figure 7-1).

804

805 In order to test the idea that noise correlations might focus learning onto relevant  
806 dimensions, we extracted weight updates from each trial and projected these  
807 updates into a two-dimensional space where the first dimension captured the  
808 relative sensitivity to leftward versus rightward motion and the second dimension  
809 captured relative sensitivity to upward versus downward motion. In the model  
810 where input units were only correlated within their identically tuned pool, weight  
811 updates projected in all directions more or less uniformly (figure 7G), and did not  
812 differ systematically across trial types (vertical versus horizontal). However,  
813 dynamic noise correlations that shared variability across the relevant dimension  
814 tended to push weight updates onto the appropriate dimension for a given trial  
815 (figure 4F; *t*-test for difference in the magnitude of updating in up/down and  
816 left/right dimensions across conditions [up/down – left/right]:  $t = 3.4$ ,  $dof=98$ ,  $p =$   
817  $0.001$ ). In contrast, dynamic noise correlations that shared variability across the  
818 irrelevant dimension tended to push weight updates onto the wrong dimension  
819 (figure 4H; *t*-test for difference in the magnitude of updating in up/down and  
820 left/right dimensions across conditions [up/down – left/right]:  $t = -9.5$ ,  $dof=98$ ,  $p =$   
821  $10e-14$ ). Both of these trends were consistent across simulations, providing an  
822 explanation for the performance improvements achieved by relevant noise  
823 correlations (projection of learning onto an appropriate dimension) and  
824 performance impairments produced by irrelevant noise correlations (projection of  
825 learning onto an inappropriate dimension).

826

827

828

829

830

831

832

833

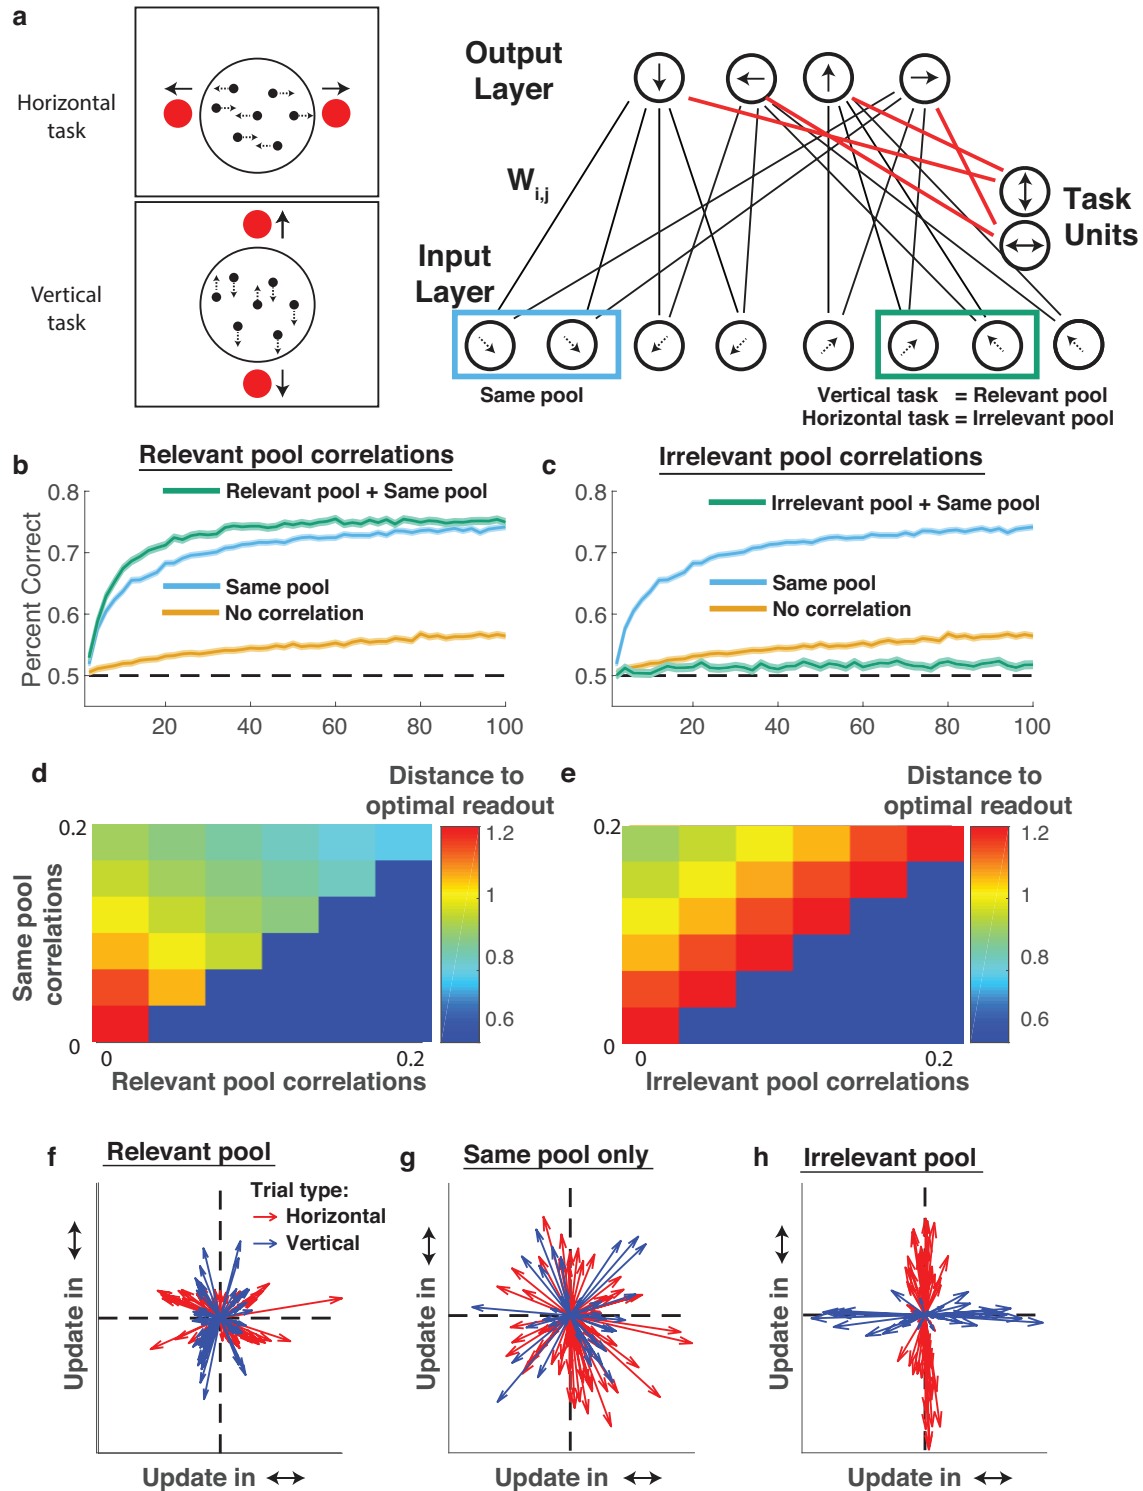

834  
835  
836  
837  
838  
839  
840  
841

**Figure 7: Task dependent noise correlations affect learning speed by projecting learning onto specific feature dimensions. A)** A neural network was trained to perform two interleaved motion discrimination tasks (left; (Cohen and Newsome, 2008)). Network schematic (right) depicts two-layer feed-forward network in which each homogenous pool of input units represents two dimensions of motion (up versus down, and left versus right), and output units produce

842 responses in favor of alternative actions (up, down, left, right). Each homogenous pool of input  
843 units is identically tuned to one of four conjunctions of movement directions: up-left, down-left, up-  
844 right, down-right. Two additional input units provide cue information that biases output units to  
845 produce an output corresponding to the discrimination appropriate on this trial (eg. horizontal or  
846 vertical). Noise correlations were manipulated among 1) identically tuned neurons (blue  
847 rectangle; same pool), 2) neurons that have similar encoding of the task relevant feature (green  
848 rectangle pair in vertical trials; relevant pool), and 3) neurons that have similar encoding of the  
849 task irrelevant feature (green rectangle pair in horizontal trials; irrelevant pool). **B&C)** Learning  
850 curves showing accuracy (ordinate) over trials (abscissa) for models 1) lacking noise correlations  
851 (orange), 2) containing noise correlations that are limited to neurons that have same tuning for  
852 both features (same pool; blue), 3) containing same pool noise correlations along with  
853 correlations between neurons in different pools that have the same tuning for the task-relevant  
854 feature (in pool+rel pool; green in **B**), and 4) containing in-pool noise correlations along with  
855 correlations between neurons in different pools that have the same tuning for the task irrelevant  
856 feature (in pool+irrel pool; green in **C**). **D&E)** Distance between learned weights and the optimal  
857 readout (color) for models that differ in their level of “in pool” correlations (ordinate, both plots),  
858 “relevant pool” correlations (abscissa, **D**), and “irrelevant pool” correlations (abscissa, **E**). **F,G,H)**  
859 Weight updates for example learning sessions were projected into a two dimensional space in  
860 which net updates to the relative contribution of vertical motion information (eg. up versus down)  
861 is represented on the abscissa and updates to the relative contribution of horizontal motion  
862 information (eg. left versus right) is represented on the ordinate. Arrows reflect single trial weight  
863 updates and are colored according to the trial type (red = horizontal discrimination, blue = vertical  
864 discrimination). Weight updates for a model with only “in pool” correlations look similar across trial  
865 types (**G**), but weight updates for a model with “relevant pool” correlations indicate more weight  
866 updating on the relevant feature (**F**), whereas the opposite was observed in the case of “irrelevant  
867 pool” correlations (**H**).  
868

869

## 870 **Discussion:**

871

872 Taken together, our results suggest that in settings where the population signal-  
873 to-noise ratio is limited by external factors (eg. inputs) and relevant task  
874 representations are low dimensional, noise correlations can make learning faster  
875 and more robust by focusing learning on the most relevant dimensions. We  
876 demonstrate this basic principle in a simple perceptual learning task (figure 3),  
877 where beneficial noise correlations between similarly tuned units could be  
878 produced through a simple Hebbian learning rule (figure 6). We extended our  
879 framework to a contextual learning task to demonstrate that dynamic noise  
880 correlations that bind task relevant feature representations facilitate faster  
881 learning (figure 7b&d) by pushing learning onto task-relevant dimensions (figure  
882 7f). Given the pervasiveness of noise correlations among similarly tuned sensory  
883 neurons (Zohary et al., 1994; Maynard et al., 1999; Bair et al., 2001; Averbek  
884 and Lee, 2003; Cohen and Maunsell, 2009; Huang and Lisberger, 2009; Ecker et  
885 al., 2010; Gu et al., 2011; Adibi et al., 2013), and that the noise correlations  
886 dynamics beneficial for learning in our simulations are similar to those that have  
887 been observed *in vivo* (Cohen and Newsome, 2008), we interpret our results as  
888 suggesting that noise correlations between similarly tuned neurons are a feature  
889 of neural coding architectures that ensures efficient readout learning, rather than  
890 a bug that limits encoding potential.

891

892

893 This interpretation rests on several assumptions in our model. Of particular  
894 importance is the assumption that signal-to-noise ratio of our populations is fixed,  
895 meaning that our manipulation of noise correlations can focus variance on  
896 specific dimensions without gaining or losing information. This assumption  
897 reflects conditions in which information is limited at the level of the inputs to the  
898 population, for instance due to noisy peripheral sensors (Beck et al., 2012;  
899 Kanitscheider et al., 2015). In such conditions, even with optimal encoding,  
900 population information saturates at an upper bound determined by the  
901 information available in the inputs to the population. Therefore, fixing the signal-  
902 to-noise ratio enabled us to examine the effect of noise correlations on  
903 downstream processes that learn to read-out the population code in the absence  
904 of any influence of noise correlations on the quantity of information contained  
905 within that population code.

906

907 Previous theoretical work exploring the role of noise correlations in encoding has  
908 typically assumed that single neurons have a fixed variance, such that tilting the  
909 covariance of neural populations towards or away from the dimension of signal  
910 encoding would have a large impact on the amount of information that can be  
911 encoded by a population (figure 1a; (Averbeck et al., 2006; Moreno-Bote et al.,  
912 2014)). Such assumptions lead to the idea that positive noise correlations among  
913 similarly tuned neurons limit encoding potential, raising the question of why they  
914 are so common in the brain (Cohen and Kohn, 2011). In considering the  
915 implications of this framework, one important question is: if information encoded  
916 by the population can be increased by changing the correlation structure among  
917 neurons, where does this additional information come from? In some cases, the  
918 neural population in question may indeed receive sufficient task relevant  
919 information from upstream brain regions to reorganize its encoding in this way,  
920 but in other cases it is likely that information is limited by the inputs to a neural  
921 population (Kanitscheider et al., 2015; Kohn et al., 2016). In cases where  
922 incoming information is limited, further increasing representational capacity is not  
923 possible, and formatting information for efficient readout is essentially the best  
924 that the population code could do. Here we show that the noise correlations that  
925 have previously been described as “information limiting” are exactly the type of  
926 correlations that format information most efficiently for readout learning under  
927 such conditions.

928

929 Between these two bookends of a fixed signal-to-noise ratio and fixed single unit  
930 variance, we also simulated intermediate regimes which do not perfectly  
931 preserve the signal-to-noise ratio. In these intermediate regimes, a tradeoff  
932 emerges: noise correlations between similarly tuned neurons produce faster  
933 learning in the short term, at the cost of lower levels of asymptotic performance in  
934 the long run (Fig 5).



935

936 Jointly considering these perspectives on noise correlations provides a more  
937 nuanced view of how neural representations are likely optimized for learning. In  
938 order to optimize an objective function, a neural population can reduce correlated  
939 noise in task relevant dimensions to increase its representational capacity up to  
940 some level constrained by its inputs (Figure 8, left). But once the population is  
941 fully representing all task relevant information that has been provided to it, it can  
942 additionally optimize representations by pushing as much variance onto task  
943 relevant dimensions as possible, thereby affording efficient learning in  
944 downstream neural populations (Figure 8, right). In short, optimization of a neural  
945 population code does not occur in a vacuum, and instead depends critically on  
946 both upstream (eg. input constraints) and downstream (eg. readout) neural  
947 populations (Figure 8). In this view, if a neural population is *not* fully representing  
948 the decision relevant information made available to it, then learning could  
949 improve the efficiency of representations by reducing rate limiting noise  
950 correlations as has been observed in some paradigms (Gu et al., 2011; Ni et al.,  
951 2018). In contrast, once available information is fully represented, readout  
952 learning could be further optimized by reformatting population codes such that  
953 variability is shared across neurons with similar tuning for the relevant task  
954 feature, producing the sorts of dynamic noise correlations that have been  
955 observed in well trained animals (Cohen and Newsome, 2008).

956

957



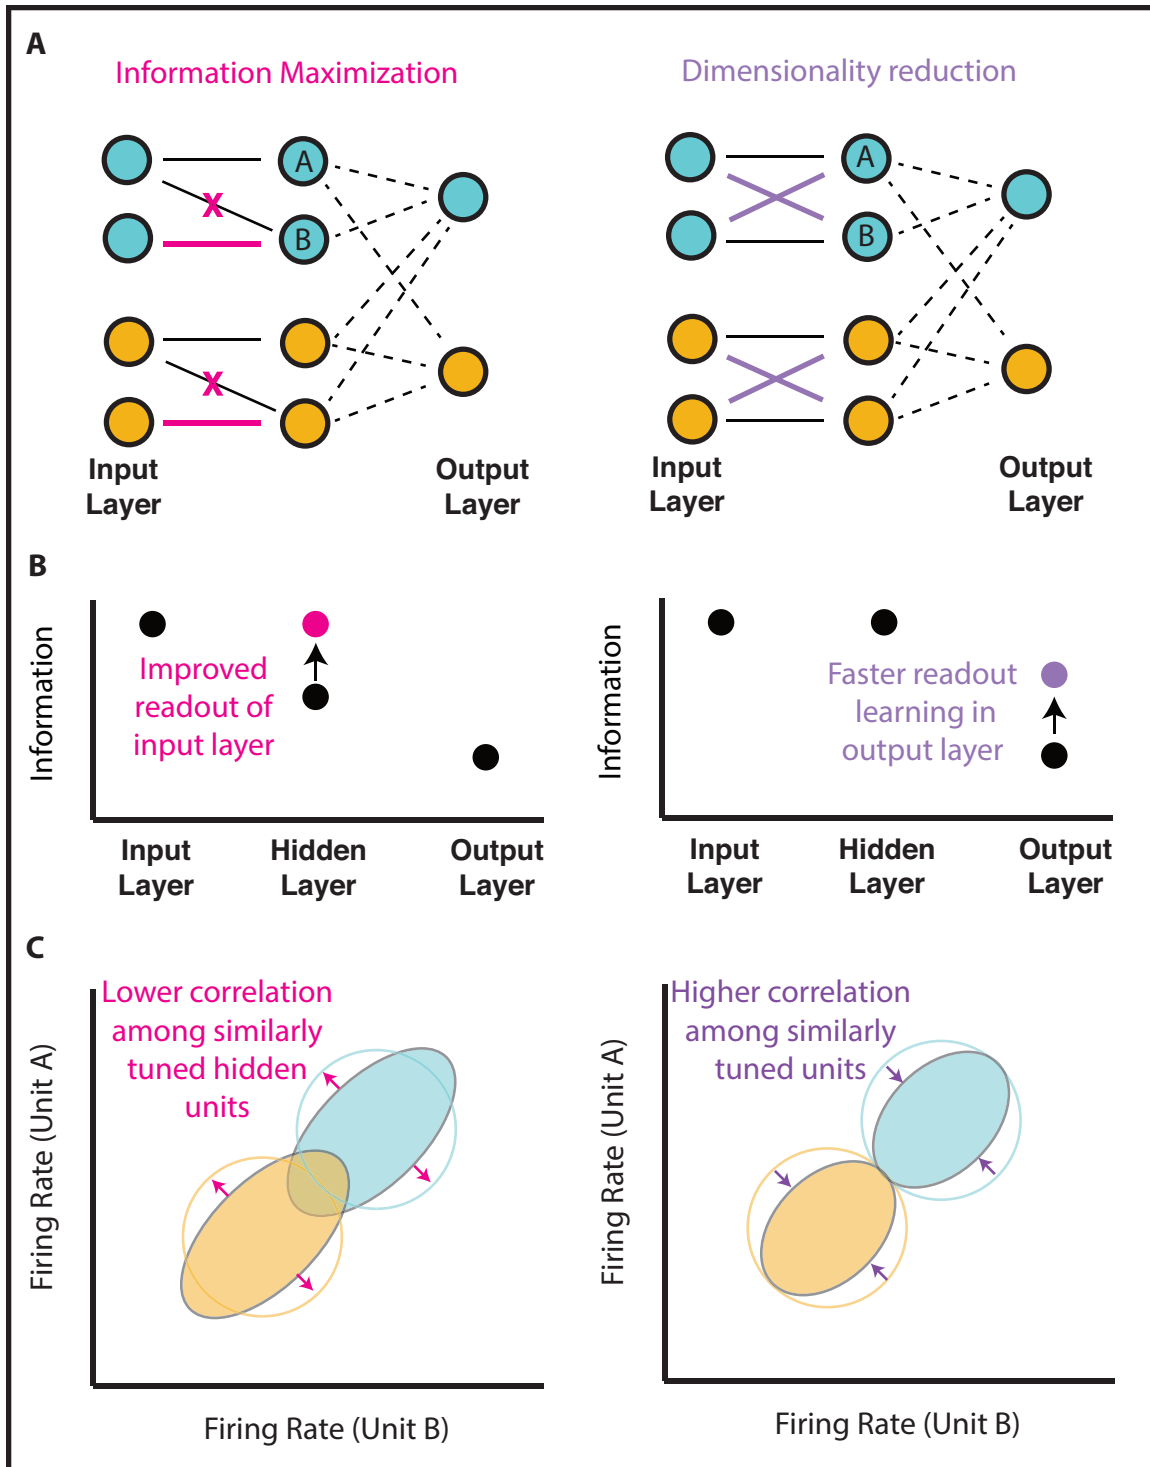

958  
959  
960  
961  
962  
963  
964  
965  
966

**Figure 8: Information maximization and dimensionality reduction can be useful for learning under different situations and have opposite effects on noise correlations among similarly tuned units. A)** A schematic representation of a three layer neural network in which units provide evidence for one of two categorizations (blue/orange). In the left network, the hidden layer initially has access to information from only one of two independent units in each pool, but weights are subsequently adjusted to increase task-relevant information represented in the hidden layer (pink). In the right network, the hidden layer initially has access to all task-relevant information, but weights are subsequently adjusted to share signal and noise across similarly

967 tuned units to afford dimensionality reduction (purple). Note that the information maximizing  
968 weight adjustments (left, pink) increase signal-to-noise ratio in the hidden layer but preserve the  
969 variance in firing rate of individual neurons, whereas the dimensionality reducing weight  
970 adjustments (right, purple) maintain a fixed signal-to-noise ratio in hidden units, but decrease the  
971 variance of individual units by averaging across multiple similarly tuned inputs. Dashed lines to  
972 output units reflect weights that need to be learned based on feedback. **B)** Task relevant  
973 information (mutual information between unit activations and stimulus category; abscissa) is  
974 depicted for each layer (ordinate). Weight adjustments affording information maximization (left)  
975 increase task relevant information in the hidden layer (pink), whereas weight adjustments that  
976 afford dimensionality reduction (right) do not affect task-relevant information in the hidden layer  
977 itself but instead increase the rate of learning in the output layer, thereby leading to more task-  
978 relevant information in the output layer (purple). **C)** Weight adjustments for information  
979 maximization (pink in panel A) *decrease* correlations among hidden units A&B by removing  
980 shared input from a single input unit and instead providing independent sources of input to each  
981 unit (pink arrows). In contrast, weight adjustments for dimensionality reduction *increase* noise  
982 correlations among hidden units A&B by providing them with the same mixture of information  
983 from the two identically tuned input units. We propose that both of these processes play a critical  
984 role in learning and that changes in noise correlations across learning will depend critically on  
985 which process dominates. As shown in panel B, this will depend critically on whether the neural  
986 population in question has already fully represented information available from its inputs. In  
987 principle, these processes could occur serially, with early learning maximizing information  
988 available in intermediate layers (left) and later learning compressing that information into a format  
989 allowing rapid readout learning (right).

990  
991  
992 In addition to key assumptions about an external limitation on signal-to-noise, our  
993 modeling included a number of simplifying assumptions that are unlikely to hold  
994 up in real neural populations. For example, we consider pools of neurons  
995 identically tuned to discrete stimuli, rather than a continuous space of stimuli and  
996 the heterogeneous populations observed in sensory cortical regions of the brain.  
997 Previous work has shown that noise correlations do not necessarily limit  
998 encoding potential in heterogenous populations with diverse tuning (Shamir and  
999 Sompolinsky, 2004; 2006; Chelaru and Dragoi, 2008; Ecker et al., 2011). A  
1000 primary goal of our work was to identify the computational principles that control  
1001 the speed at which readout can be learned, and our simplified populations are  
1002 considerably more tractable and transparent than realistic neural populations.  
1003 The principles that we identify here are certainly at play in real neural  
1004 populations, albeit with implications that are far less transparent. In particular, in  
1005 a population with diverse tuning profiles, the degree to which individual neurons  
1006 are informative about a task-relevant discrimination will vary. To benefit learning  
1007 through coordinated weighted changes, the correlation structure in such  
1008 populations should reflect this variability. Empirical studies in macaques suggest  
1009 that such variability is indeed present in real populations (Cohen and Maunsell,  
1010 2009; Rabinowitz et al., 2015; Ruff and Cohen, 2016; Bondy et al., 2018). We  
1011 hope that our simplified results pave the way for future work to assess nuances  
1012 that can emerge in mixed heterogeneous populations, or in more realistic  
1013 architectures that go beyond the simple feed forward flow of information  
1014 considered here.  
1015

1016 *Model predictions*

1017

1018 Our work shows that noise correlations can focus the gradient of learning onto  
1019 the most appropriate dimensions. Thus, our model predicts that the degree to  
1020 which similarly tuned neurons are correlated during a perceptual discrimination  
1021 should be positively related to performance improvements experienced on  
1022 subsequent discriminations. In contrast, our model predicts that the degree of  
1023 correlation between neurons that are similarly tuned to a task irrelevant feature  
1024 should control the degree of learning on irrelevant dimensions, and thus  
1025 negatively relate to performance improvements on subsequent discriminations.  
1026 These predictions are strongest for the earliest stages of learning where weight  
1027 adjustments are critical for subsequent performance, but they may also hold for  
1028 later stages of learning, when correlations on irrelevant dimensions, including  
1029 independent noise channels, could potentially lead to systematic deviations from  
1030 optimal readout (figure 2f, 4d&e). These predictions could be tested by recording  
1031 neural responses to a stimulus set that differs across multiple features to  
1032 characterize both signal-to-noise and correlated variability for each feature  
1033 discrimination. A strong prediction of our model is that correlated variability within  
1034 neurons tuned to a given feature should be a predictor of subsequent learning of  
1035 responses to that feature – above and beyond feature value discriminability.

1036

1037 One interesting special case involves tasks where the relevant dimension  
1038 changes in an un signaled manner (Birrell and Brown, 2000). In such tasks, noise  
1039 correlations on the previously relevant dimension would, after such an  
1040 “extradimensional shift”, force gradients into a task-irrelevant dimension and thus  
1041 impair learning performance. Interestingly, learning after extra-dimensional shifts  
1042 can be selectively improved by enhancing noradrenergic signaling (Devauges  
1043 and Sara, 1990; Lapid and Morilak, 2006), which leads to increased arousal  
1044 (Joshi et al., 2016; Reimer et al., 2016) and decreased cortical pairwise noise  
1045 correlations in sensory and higher order cortex (Vinck et al., 2015; Joshi and  
1046 Gold, n.d.). While these observations have been made in different paradigms,  
1047 our model suggests that the reduction of noise correlations resulting from  
1048 increased sustained levels of norepinephrine after an extradimensional shift  
1049 (Bouret and Sara, 2005) could mediate faster learning by expanding the  
1050 dimensionality of the learning gradients (compare figure 7G to 7F) to consider  
1051 features that have not been task-relevant in the past.

1052

1053 *Relation to attentional effects on noise correlations*

1054

1055 In broad strokes, our finding that manipulation of noise correlations can focus  
1056 variance on specific dimensions is in line with specific models of attention. In  
1057 particular, noise reduction in task irrelevant dimensions might be considered in  
1058 the same light that is often cast on suppression of task irrelevant dimensions by  
1059 attentional mechanisms (Zanto and Gazzaley, 2009), in particular for purposes of

1060 accurate credit assignment (Akaishi et al., 2016; Leong et al., 2017). One  
1061 possibility is that compressed low-dimensional task representations in higher-  
1062 order decision regions (Mack et al., 2019) may pass accumulated decision  
1063 related information back to sensory regions in order to approximate Bayesian  
1064 inference (Haefner et al., 2016; Bondy et al., 2018; Lange et al., 2018). As task  
1065 relevant features are learned, such a process would promote noise correlations  
1066 between neurons coding those relevant features. In other words, noise  
1067 correlations may reflect a chosen hypothesis about which feature is relevant for  
1068 predicting outcomes. Such a signal would be beneficial if it could persist (and  
1069 thus preserve correlations between neurons tuned to the same task relevant  
1070 feature value) until the time of feedback or reinforcement. Recent work showing  
1071 strengthened noise correlations between similarly tuned neurons during working  
1072 memory maintenance suggests that this might very well be the case (Merrikhi et  
1073 al., 2018).

1074  
1075 One observation that seems at odds with this interpretation is that manipulations  
1076 of attention that cue a particular location or feature tend to decrease noise  
1077 correlations among neurons that encode that location or feature (Cohen and  
1078 Maunsell, 2009; Mitchell et al., 2009; Cohen and Maunsell, 2011; Herrero et al.,  
1079 2013; Doiron et al., 2016). The effects of attentional cuing on noise correlations  
1080 are dynamic in that cues change from one trial to the next, and contextual, in that  
1081 noise correlations are reduced most dramatically among neurons that contribute  
1082 evidence toward the same response in a manner consistent with increasing the  
1083 amount of task relevant information in the population code (Ruff and Cohen,  
1084 2014; Downer et al., 2015). These effects are generally observed in well-trained  
1085 animals during task performance and may not result from the same processes as  
1086 the longer timescale noise correlation structure. Indeed, there may be a tradeoff  
1087 between learning and performance, particularly if the computations giving rise to  
1088 noise correlations do so without perfectly preserving signal-to-noise ratio. Our  
1089 model does not account for these attentional effects, as we intentionally  
1090 constrained the signal-to-noise ratio of our neural populations, thereby  
1091 eliminating any potential changes in information encoding potential. However, we  
1092 hope that our work motivates future studies to jointly consider the impacts of  
1093 noise correlations on both learning and immediate performance in order to better  
1094 understand the potentially competing imperatives that the brain faces in  
1095 dynamically controlling the correlation structure of its own representations (see  
1096 (Haimerl et al., 2019) for one attempt to do so).

1097  
1098

### 1099 *Origins of useful noise correlations*

1100

1101 One important question stemming from our work is how noise correlations  
1102 emerge in the brain. This question has been one of longstanding debate, largely  
1103 because there are so many potential mechanisms through which correlations

1104 could emerge (Kanitscheider et al., 2015; Kohn et al., 2016). Noise correlations  
1105 could emerge from convergent and divergent feed forward wiring (Shadlen and  
1106 Newsome, 1998), local connectivity patterns within a neural population (Hansen  
1107 et al., 2012; Smith et al., 2013), or top down inputs provided separately to  
1108 different neural populations (Haefner et al., 2016). Here we show that static noise  
1109 correlations that are useful for perceptual learning emerge naturally from  
1110 Hebbian learning in a feed-forward network. While this certainly suggests that  
1111 useful noise correlations could emerge through feed forward wiring, it is also  
1112 possible to consider our Hebbian learning as occurring in a one-step recurrence  
1113 of the input units, and thus the same data support the possibility of noise  
1114 correlations through local recurrence. The context dependent noise correlations  
1115 that speed learning (figure 7), however, would not arise through simple Hebbian  
1116 learning. Such correlations could potentially be produced through selective top-  
1117 down signals from the choice neurons, as has been previously proposed  
1118 (Wimmer et al., 2015; Haefner et al., 2016; Bondy et al., 2018; Lange et al.,  
1119 2018). Moreover, top-down input may selectively target neuronal ensembles  
1120 produced through Hebbian learning (Collins and Frank, 2013). While previous  
1121 work has suggested that such a mechanism could be adaptive for accumulating  
1122 information over the course of a decision (Haefner et al., 2016), our work  
1123 demonstrates that the same mechanism could effectively be used to tag relevant  
1124 neurons for weight updating between trials, making efficient use of top-down  
1125 circuitry. Haimerl et al. recently made a similar point, showing that stochastic  
1126 modulatory signals shared across task-informative neurons can serve to tag  
1127 them for a decoder (Haimerl et al., 2019).

1128

### 1129 *Noise correlations as inductive biases*

1130

1131 Artificial intelligence has undergone a revolution over the past decade leading to  
1132 human level performance in a wide range of tasks (Mnih et al., 2015). However,  
1133 a major issue for modern artificial intelligence systems, which build heavily on  
1134 neural network architectures, is that they require far more training examples than  
1135 a biological system would (Hassabis et al., 2017). This biological advantage  
1136 occurs despite the fact that the total number of synapses in the human brain,  
1137 which could be thought of as the free parameters in our learning architecture, is  
1138 much greater than the number of weights in even the most parameter-heavy  
1139 deep learning architectures. Our work provides some insight into why this occurs;  
1140 correlated variability across neurons in the brain constrain learning to specific  
1141 dimensions, thereby limiting the effective complexity of the learning problem  
1142 (figures 4A, 7F-G). We show that, for simple tasks, this can be achieved using  
1143 Hebbian learning rules (figure 6), but that contextual noise correlations, of the  
1144 form that might be produced through top-down signals (Haefner et al., 2016), are  
1145 critical for appropriately focusing learning in more complex circumstances. In  
1146 principle, algorithms that effectively learn and implement noise correlations might  
1147 reduce the amount of data needed to train AI systems by limiting degrees of

1148 freedom to those dimensions that are most relevant. Furthermore, our work  
1149 suggests that large scale neural recordings in early stages of learning complex  
1150 tasks might serve as indicators of the inductive biases that constrain learning in  
1151 biological systems.

1152

1153 In summary, we show that under external constraints of task-relevant  
1154 information, noise correlations that have previously been called “rate limiting” can  
1155 serve an important role in constraining learning to task-relevant dimensions. In  
1156 the context of previous theory focusing on representation, our work suggests that  
1157 neural populations are subject to competing forces when optimizing covariance  
1158 structures; on one hand reducing correlations between pairs of similarly tuned  
1159 neurons can be helpful to fully represent available information, but increasing  
1160 correlations among similarly tuned neurons can be helpful for assigning credit to  
1161 task relevant features. We believe that this view of the learning process not only  
1162 provides insight to understanding the role of noise correlations in the brain, but  
1163 opens up the door to better understand the inductive biases that guide learning in  
1164 biological systems.

1165

1166

1167 References:

1168

1169

1170 Adibi M, McDonald JS, Clifford CWG, Arabzadeh E (2013) Adaptation improves  
1171 neural coding efficiency despite increasing correlations in variability. *Journal*  
1172 *of Neuroscience* 33:2108–2120.

1173 Akaishi R, Kolling N, Brown JW, Rushworth M (2016) Neural Mechanisms of  
1174 Credit Assignment in a Multicue Environment. *Journal of Neuroscience*  
1175 36:1096–1112.

1176 Averbeck BB, Latham PE, Pouget A (2006) Neural correlations, population  
1177 coding and computation. *Nature Reviews Neuroscience* 7:358–366.

1178 Averbeck BB, Lee D (2003) Neural noise and movement-related codes in the  
1179 macaque supplementary motor area. *Journal of Neuroscience* 23:7630–  
1180 7641.

1181 Bair W, Zohary E, Newsome WT (2001) Correlated firing in macaque visual area  
1182 MT: time scales and relationship to behavior. *Journal of Neuroscience*  
1183 21:1676–1697.

1184 Beck JM, Ma WJ, Pitkow X, Latham PE, Pouget A (2012) Perspective. *Neuron*  
1185 74:30–39.

1186 Birrell JM, Brown VJ (2000) Medial frontal cortex mediates perceptual attentional



- 1187 set shifting in the rat. *Journal of Neuroscience* 20:4320–4324.
- 1188 Bondy AG, Haefner RM, Cumming BG (2018) Feedback determines the structure  
1189 of correlated variability in primary visual cortex. *Nature Publishing Group*:1–  
1190 15.
- 1191 Bouret S, Sara SJ (2005) Network reset: a simplified overarching theory of locus  
1192 coeruleus noradrenaline function. *Trends in Neurosciences* 28:574–582.
- 1193 Chelaru MI, Dragoi V (2008) Efficient coding in heterogeneous neuronal  
1194 populations. *Proceedings of the National Academy of Sciences* 105:16344–  
1195 16349.
- 1196 Cohen MR, Kohn A (2011) Measuring and interpreting neuronal correlations.  
1197 *Nature Publishing Group* 14:811–819.
- 1198 Cohen MR, Maunsell JHR (2009) Attention improves performance primarily by  
1199 reducing interneuronal correlations. *Nature Publishing Group* 12:1594–1600.
- 1200 Cohen MR, Maunsell JHR (2011) Using neuronal populations to study the  
1201 mechanisms underlying spatial and feature attention. *Neuron* 70:1192–1204.
- 1202 Cohen MR, Newsome WT (2008) Context-Dependent Changes in Functional  
1203 Circuitry in Visual Area MT. *Neuron* 60:162–173.
- 1204 Collins AGE, Frank MJ (2013) Cognitive control over learning: creating,  
1205 clustering, and generalizing task-set structure. *Psychological Review*  
1206 120:190–229.
- 1207 Devauges V, Sara SJ (1990) Activation of the noradrenergic system facilitates an  
1208 attentional shift in the rat. *Behavioural Brain Research* 39:19–28.
- 1209 Doiron B, Litwin-Kumar A, Rosenbaum R, Ocker GK, Josić K (2016) The  
1210 mechanics of state-dependent neural correlations. *Nature Publishing Group*  
1211 19:383–393.
- 1212 Downer JD, Niwa M, Sutter ML (2015) Task engagement selectively modulates  
1213 neural correlations in primary auditory cortex. *Journal of Neuroscience*  
1214 35:7565–7574.
- 1215 Ecker AS, Berens P, Keliris GA, Bethge M, Logothetis NK, Tolias AS (2010)  
1216 Decorrelated neuronal firing in cortical microcircuits. *Science* 327:584–587.
- 1217 Ecker AS, Berens P, Tolias AS, Bethge M (2011) The effect of noise correlations  
1218 in populations of diversely tuned neurons. *Journal of Neuroscience*  
1219 31:14272–14283.



- 1220 Gu Y, Liu S, Fetsch CR, Yang Y, Fok S, Sunkara A, DeAngelis GC, Angelaki DE  
1221 (2011) Perceptual learning reduces interneuronal correlations in macaque  
1222 visual cortex. *Neuron* 71:750–761.
- 1223 Haefner RM, Pietro Berkes, Fiser J (2016) Perceptual Decision-Making as  
1224 Probabilistic Inference by Neural Sampling. *Neuron* 90:649–660.
- 1225 Haimerl C, Savin C, Simoncelli EP (2019) Flexible and accurate decoding of  
1226 neural populations through stochastic comodulation. *Biorxiv* 21:598.
- 1227 Hansen BJ, Chelaru MI, Dragoi V (2012) Correlated variability in laminar cortical  
1228 circuits. *Neuron* 76:590–602.
- 1229 Hassabis D, Kumaran D, Summerfield C, Botvinick M (2017) Neuroscience-  
1230 Inspired Artificial Intelligence. *Neuron* 95:245–258.
- 1231 Hawkey DJC, Amitay S, Moore DR (2004) Early and rapid perceptual learning.  
1232 *Nature Publishing Group* 7:1055–1056.
- 1233 Herrero JL, Gieselmann MA, Sanayei M, Thiele A (2013) Attention-induced  
1234 variance and noise correlation reduction in macaque V1 is mediated by  
1235 NMDA receptors. *Neuron* 78:729–739.
- 1236 Hu, Y., Zylberberg, J., & Shea-Brown, E. (2014). The sign rule and beyond: boundary  
1237 effects, flexibility, and noise correlations in neural population codes. *PLoS Comput*  
1238 *Biol*, 10(2), e1003469.
- 1239 Huang X, Lisberger SG (2009) Noise correlations in cortical area MT and their  
1240 potential impact on trial-by-trial variation in the direction and speed of  
1241 smooth-pursuit eye movements. *Journal of Neurophysiology* 101:3012–3030.
- 1242 Joshi S, Gold JI (n.d.) Context-Dependent Relationships between Locus  
1243 Coeruleus Firing Patterns and Coordinated Neural Activity in the Anterior  
1244 Cingulate Cortex. *Biorxiv*.
- 1245 Joshi S, Li Y, Kalwani RM, Gold JI (2016) Relationships between Pupil Diameter  
1246 and Neuronal Activity in the Locus Coeruleus, Colliculi, and Cingulate Cortex.  
1247 *Neuron* 89:221–234.
- 1248 Kanitscheider I, Coen-Cagli R, Pouget A (2015) Origin of information-limiting  
1249 noise correlations. *Proceedings of the National Academy of Sciences*  
1250 112:E6973–E6982.
- 1251 Kohn A, Coen-Cagli R, Kanitscheider I, Pouget A (2016) Correlations and  
1252 Neuronal Population Information. *Annu Rev Neurosci* 39:237–256.
- 1253 Krotov D, Hopfield JJ (2019) Unsupervised learning by competing hidden units.

- 1254 Proceedings of the National Academy of Sciences 116:7723–7731.
- 1255 Lange RD, Chatteraj A, Beck JM, Yates JL, Haefner RM (2018) A confirmation  
1256 bias in perceptual decision-making due to hierarchical approximate inference.  
1257 *Biorxiv*.
- 1258 Lapiz MDS, Morilak DA (2006) Noradrenergic modulation of cognitive function in  
1259 rat medial prefrontal cortex as measured by attentional set shifting capability.  
1260 *Neuroscience* 137:1039–1049.
- 1261 Law C-T, Gold JI (2009) Reinforcement learning can account for associative and  
1262 perceptual learning on a visual-decision task. *Nature Neuroscience* 12:655–  
1263 663.
- 1264 Leong YC, Radulescu A, Daniel R, DeWoskin V, Niv Y (2017) Dynamic  
1265 Interaction between Reinforcement Learning and Attention in  
1266 Multidimensional Environments. *Neuron* 93:451–463.
- 1267 Mack ML, Preston AR, Love BC (2019) Ventromedial prefrontal cortex  
1268 compression during concept learning. *Nature Communications*:1–11.
- 1269 Maynard EM, Hatsopoulos NG, Ojakangas CL, Acuna BD, Sanes JN, Normann  
1270 RA, Donoghue JP (1999) Neuronal interactions improve cortical population  
1271 coding of movement direction. *Journal of Neuroscience* 19:8083–8093.
- 1272 Merrikhi Y, Clark K, Noudoost B (2018) Concurrent influence of top-down and  
1273 bottom-up inputs on correlated activity of Macaque extrastriate neurons.  
1274 *Nature Communications* 9:5393.
- 1275 Mitchell JF, Sundberg KA, Reynolds JH (2009) Spatial attention decorrelates  
1276 intrinsic activity fluctuations in macaque area V4. *Neuron* 63:879–888.
- 1277 Mnih V, Kavukcuoglu K, Silver D, Rusu AA, Veness J, Bellemare MG, Graves A,  
1278 Riedmiller M, Fidjeland AK, Ostrovski G, Petersen S, Beattie C, Sadik A,  
1279 Antonoglou I, King H, Kumaran D, Wierstra D, Legg S, Hassabis D (2015)  
1280 Human-level control through deep reinforcement learning. *Nature* 518:529–  
1281 533.
- 1282 Moreno-Bote R, Beck J, Kanitscheider I, Pitkow X, Latham P, Pouget A (2014)  
1283 Information-limiting correlations. *Nature Publishing Group* 17:1410–1417.
- 1284 Ni AM, Ruff DA, Alberts JJ, Symmonds J, Cohen MR (2018) Learning and  
1285 attention reveal a general relationship between population activity and  
1286 behavior. *Science* 359:463–465.
- 1287 Oja E (1982) Simplified neuron model as a principal component analyzer. *Journal*

- 1288 of Mathematical Biology:1–7.
- 1289 Pouget A, Dayan P, Zemel R (2000) Information processing with population  
1290 codes. *Nature Reviews Neuroscience* 1:125–132.
- 1291 Rabinowitz NC, Goris RL, Cohen M, Simoncelli EP (2015) Attention stabilizes the  
1292 shared gain of V4 populations. *eLife* 4:e08998.
- 1293 Reimer J, McGinley MJ, Liu Y, Rodenkirch C, Wang Q, McCormick DA, Tolias  
1294 AS (2016) Pupil fluctuations track rapid changes in adrenergic and  
1295 cholinergic activity in cortex. *Nature Communications* 7:13289.
- 1296 Ruff DA, Cohen MR (2014) Attention can either increase or decrease spike count  
1297 correlations in visual cortex. *Nature Publishing Group* 17:1591–1597.
- 1298 Ruff DA, Cohen MR (2016) Stimulus Dependence of Correlated Variability across  
1299 Cortical Areas. *Journal of Neuroscience* 36:7546–7556.
- 1300 Shadlen MN, Newsome WT (1998) The variable discharge of cortical neurons:  
1301 implications for connectivity, computation, and information coding. *J Neurosci*  
1302 18:3870–3896.
- 1303 Shamir M, Sompolinsky H (2004) Nonlinear population codes. *Neural Comput*  
1304 16:1105–1136.
- 1305 Shamir M, Sompolinsky H (2006) Implications of neuronal diversity on population  
1306 coding. *Neural Comput* 18:1951–1986.
- 1307 Smith MA, Jia X, Zandvakili A, Kohn A (2013) Laminar dependence of neuronal  
1308 correlations in visual cortex. *Journal of Neurophysiology* 109:940–947.
- 1309 Stringer C, Michaelos M, Pachitariu M (2019) High precision coding in mouse  
1310 visual cortex. *Biorxiv*.
- 1311 Tsvividis P, Pouncy T, Xu JL, Tenenbaum JB, Gershman SJ (2017) Human  
1312 Learning in Atari. 2017 AAAI Spring Symposium Series, Science of  
1313 Intelligence: Computational Principles of Natural and Artificial Intelligence:1–  
1314 4.
- 1315 Vinck M, Batista-Brito R, Knoblich U, Cardin JA (2015) Arousal and Locomotion  
1316 Make Distinct Contributions to Cortical Activity Patterns and Visual Encoding.  
1317 *Neuron* 86:740–754.
- 1318 Wimmer RD, Schmitt LI, Davidson TJ, Nakajima M, Deisseroth K, Halassa MM  
1319 (2015) Thalamic control of sensory selection in divided attention. *Nature*  
1320 526:705–709.

1321 Zanto TP, Gazzaley A (2009) Neural Suppression of Irrelevant Information  
1322 Underlies Optimal Working Memory Performance. *Journal of Neuroscience*  
1323 29:3059–3066.

1324 Zohary E, Shadlen MN, Newsome WT (1994) Correlated neuronal discharge rate  
1325 and its implications for psychophysical performance. *Nature* 370:140–143.

1326

1327

1328

1329

1330 Extended data:

1331

1332

1333

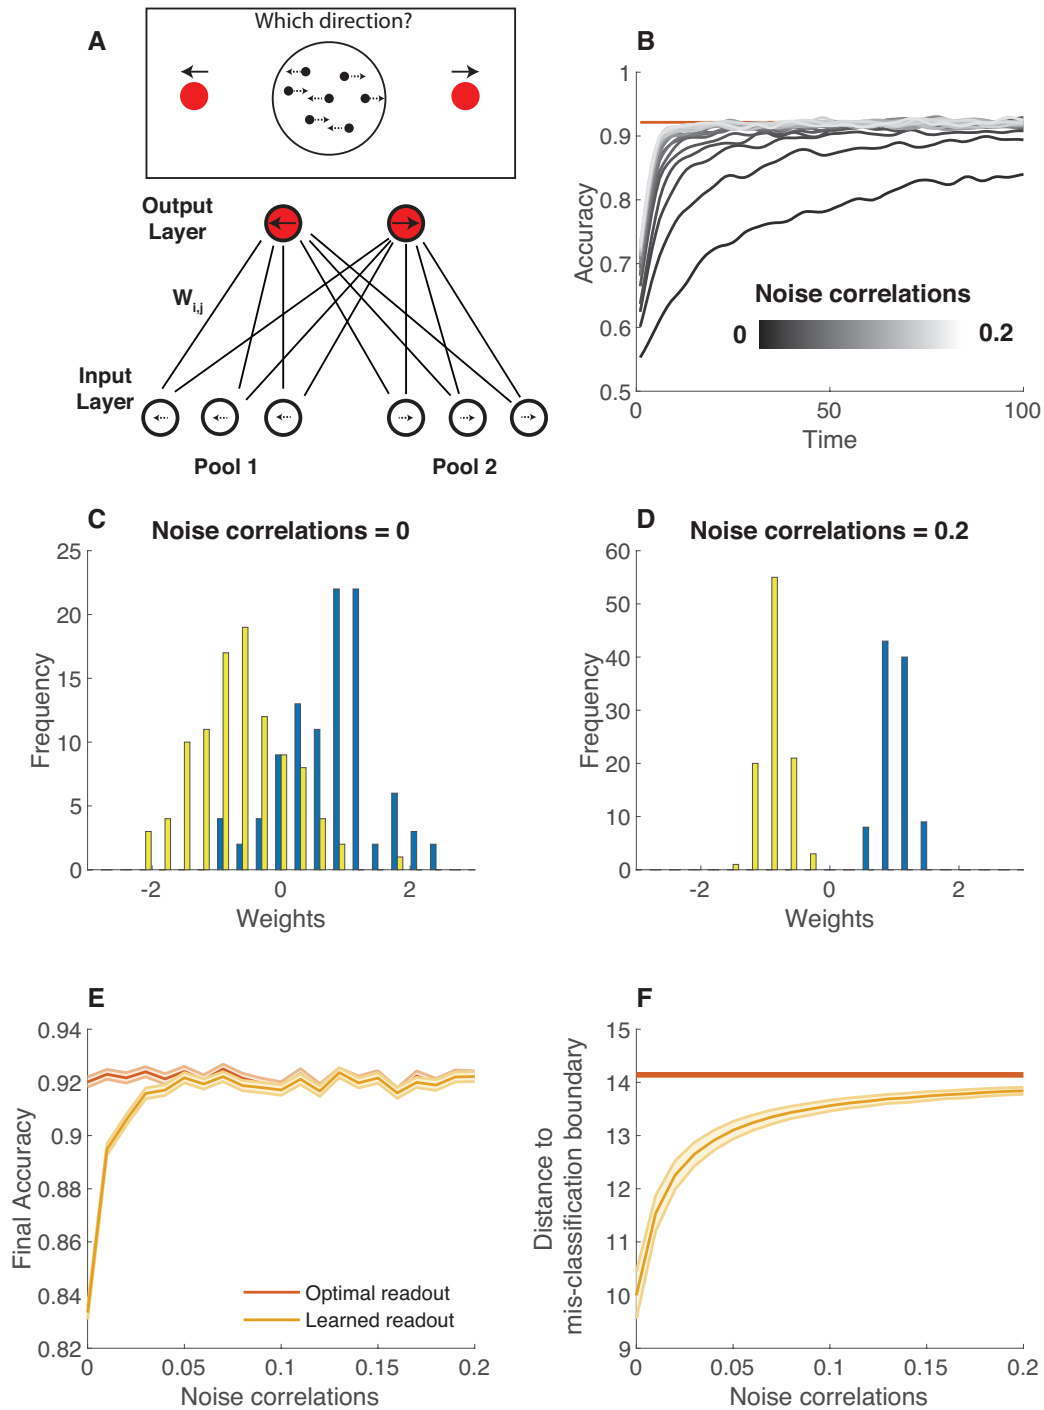

1334  
 1335 **Extended data figure 3-1: Noise correlations that maintain signal-to-noise ratio by scaling**  
 1336 **signal lead to faster and more robust learning of a perceptual discrimination.** This figure is  
 1337 a replication of results reported in figure 3 of the main text, except that noise correlations are  
 1338 produced using equation 25 such that each unit maintains the same fixed variance across noise  
 1339 correlation conditions, and signal is scaled to maintain a fixed signal-to-noise ratio. **A)** A two-layer  
 1340 feed-forward neural network was designed to solve a two alternative forced choice motion  
 1341 discrimination task at or near perceptual threshold. Input layer contains two pools of neurons that  
 1342 provide evidence for alternate percepts (eg. leftward motion versus rightward motion) and output

1343 neurons encode alternate courses of actions (eg. saccade left versus saccade right). Layers are  
1344 fully connected with weights randomized to small values and adjusted after each trial according to  
1345 rewards (see methods). **B)** Average learning curves for neural network models in which  
1346 population signal-to-noise ratio in pools 1 and 2 were fixed, but noise correlations (grayscale)  
1347 were allowed to vary from small (dark) to large (light) values. **C&D)** Weight differences (left output  
1348 – right output) for each input unit (color coded according to pool) after 100 timesteps of learning  
1349 for low (**C**) and high (**D**) noise correlations. **E)** Accuracy in the last 20 training trials is plotted as a  
1350 function of noise correlations for learned readouts (orange) and optimal readout (red).  
1351 Lines/shading reflect Mean/SEM. **F)** The shortest distance, in terms of neural activation, required  
1352 to take the mean input for a given category (eg. left or right) to the boundary that would result in  
1353 misclassification is plotted for the final learned (orange) and optimal (red) weights for each noise  
1354 correlation condition (abscissa). Lines/shading reflect Mean/SEM.  
1355  
1356  
1357  
1358  
1359  
1360  
1361

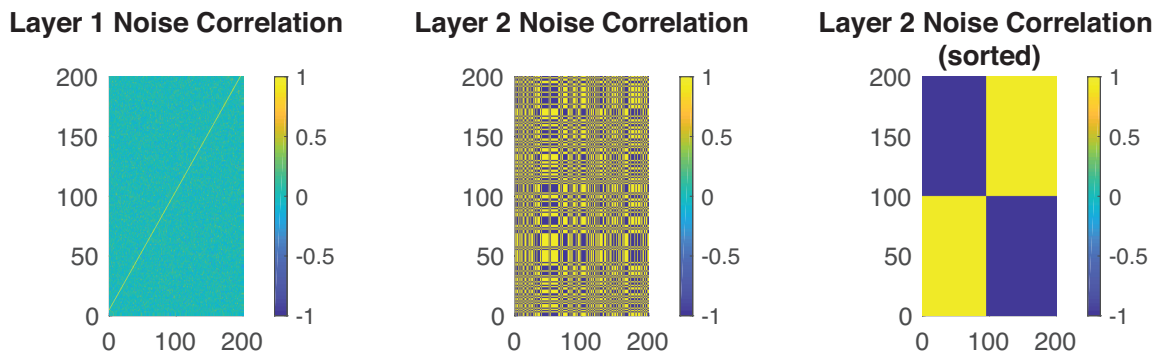

1362  
1363 **Extended data figure 6-1: Emergence of noise correlations from Hebbian learning does not**  
1364 **depend on weight initialization.** In order to test whether beneficial noise correlations might have  
1365 emerged in our Hebbian learning simulations due to our initialization biasing one-to-one  
1366 connectivity between the input and hidden layers (see figure 4), we repeated these simulations  
1367 with in a network that was initialized with random normal weight projects from layer 1 to layer 2.  
1368 Simulations included performance of 200 trials with noise correlations measured in the final 100  
1369 trials of the simulation. Activity of layer 1 units was defined by a multivariate Gaussian with zero  
1370 covariance elements, and thus it is not surprising that pairwise noise correlations measured in the  
1371 activity of that layer were near zero (Left). Activity of layer 2 units was sculpted through Hebbian  
1372 learning that shaped connectivity between layer 1 and layer 2. This learning led many pairs of  
1373 neurons in layer 2 to become highly correlated and many other pairs to become anti-correlated  
1374 (middle, blue and yellow elements, respectively). In order to understand the structure defining  
1375 these correlations, we sorted the layer 2 units according to their relative projections to the two  
1376 output units (weight to output 1 – weight to output 2), and recomputed the pairwise correlations  
1377 (right). This sorting reveals that layer 2 units projecting to the same output unit are positively  
1378 correlated with one another, whereas they negatively correlate with the layer 2 units that project  
1379 to the opposing output neuron (note block diagonal structure).  
1380  
1381  
1382  
1383  
1384

1385  
1386

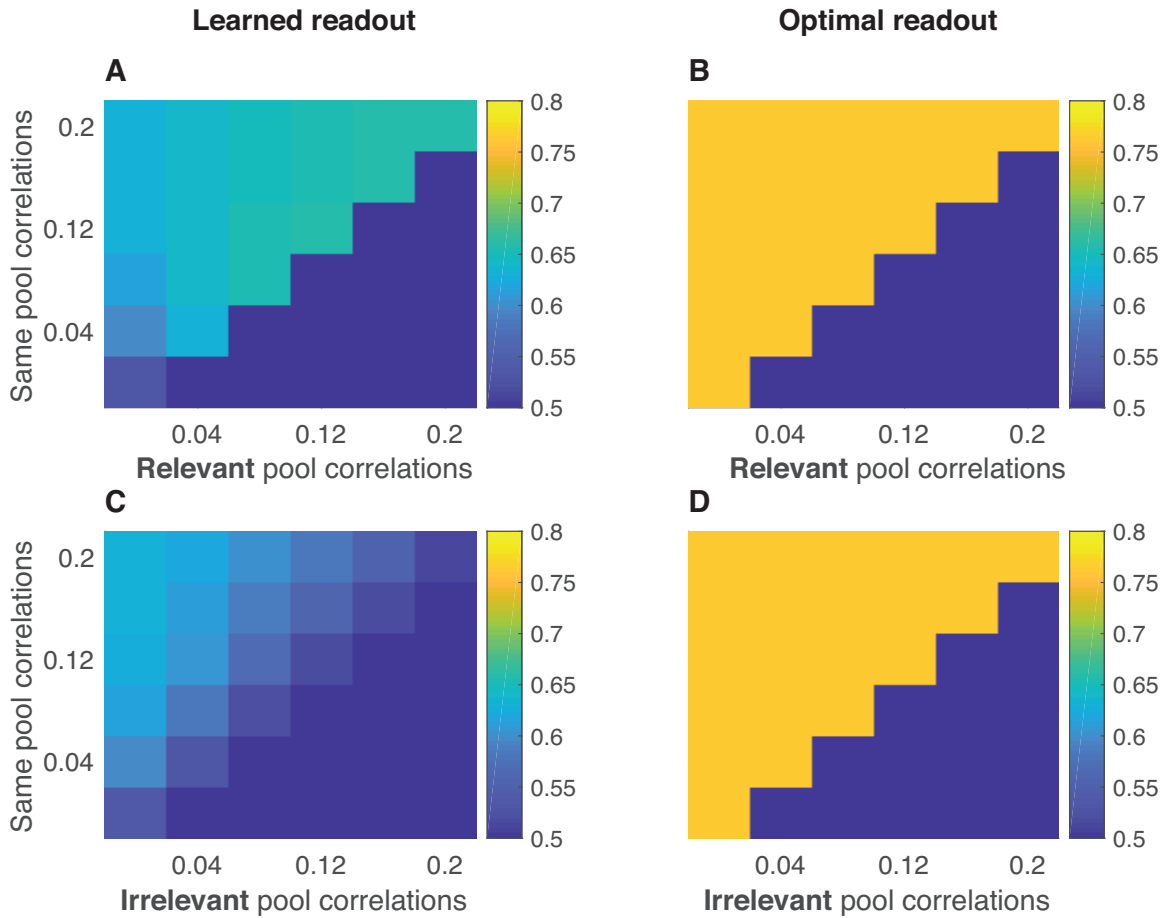

1387  
1388  
1389  
1390  
1391  
1392  
1393  
1394  
1395  
1396  
1397  
1398  
1399

**Extended data figure 7-1: Noise correlations affect speed of learning, but not performance using optimal readout in multiple discrimination task.** **A)** Mean test accuracy (color) of all models spanning the range of in pool correlations (abscissa) and relevant pool correlations (ordinate). **B)** Mean accuracy of same models using optimal readout, rather than the learned readout. **C)** Mean test accuracy (color) of all models spanning the range of in pool correlations (abscissa) and irrelevant pool correlations (ordinate). **D)** Mean accuracy of same models using optimal readout, rather than the learned readout. Note that performance of all models is identical when readout is optimal, rather than learned.

1400
